1 **Plethora of QTLs found in *Arabidopsis thaliana* reveals complexity of**  
2 **genetic variation for photosynthesis in dynamic light conditions**

3  
4 Tom P.J.M. Theeuwes<sup>1,\*</sup>, Louise L. Logie<sup>1</sup>, Sanne Put<sup>1,5</sup>, Hedayat Bagheri<sup>1</sup>, Konrad Łosiński<sup>1</sup>, Justine  
5 Drouault<sup>1,6</sup>, Pádraic J. Flood<sup>1,7</sup>, Corrie Hanhart<sup>1</sup>, Frank F.M. Becker<sup>1</sup>, Raúl Wijffjes<sup>3,8</sup>, David Hall<sup>4</sup>, David M.  
6 Kramer<sup>4</sup>, Jeremy Harbinson<sup>2</sup>, Mark G.M. Aarts<sup>1</sup>

7  
8 <sup>1</sup> Laboratory of Genetics, Wageningen University & Research, Wageningen, the Netherlands

9 <sup>2</sup> Laboratory of Biophysics, Wageningen University & Research, Wageningen, the Netherlands

10 <sup>3</sup> Bioinformatics Group, Wageningen University & Research, Wageningen, the Netherlands

11 <sup>4</sup> MSU-DOE Plant Research Lab, Michigan State University, East Lansing, USA

12  
13 Present addresses:

14 <sup>5</sup> Laboratory of Plant Breeding, Wageningen University & Research, Wageningen, the Netherlands

15 <sup>6</sup> LEPSE, Université de Montpellier, INRAE, Institut Agro, Montpellier, France

16 <sup>7</sup> INFARM - Indoor Urban Farming B.V., Wageningen, The Netherlands

17 <sup>8</sup> Institute of Genetics, Faculty of Biology, LMU Munich, Planegg-Martinsried, Germany

18  
19 \* Correspondence to:

20 T.P.J.M. Theeuwes – tom.theeuwes@wur.nl

## 21 **Abstract**

22 The environments in which plant species evolved are now generally understood to be dynamic rather than  
23 static. Photosynthesis has to operate within these dynamic environments, such as sudden changes to light  
24 intensities. Plants have evolved photoprotection mechanisms that prevent damage caused by sudden  
25 changes to high light intensities. The extent of genetic variation within plants species to deal with these  
26 dynamic light conditions remains largely unexplored. Here we show that one accession of *A. thaliana* has  
27 a more efficient photoprotection mechanism in dynamic light conditions, compared to six other accessions.  
28 The construction of a doubled haploid population and subsequent phenotyping in a dynamically controlled  
29 high-throughput system reveals up to 15 QTLs for photoprotection. Identifying the causal gene underlying  
30 one of the major QTLs shows that an allelic variant of *cpFtsY* results in more efficient photoprotection under  
31 high and fluctuating light intensities. Further analyses reveal this allelic variant to be overprotecting,  
32 reducing biomass in a range of dynamic environmental conditions. This suggests that within nature,  
33 adaptation can occur to more stressful environments and that revealing the causal genes and mechanisms  
34 can help improve the general understanding of photosynthetic functioning. The other QTLs possess  
35 different photosynthetic properties, and thus together they show how there is ample intraspecific genetic  
36 variation for photosynthetic functioning in dynamic environments. With photosynthesis being one of the  
37 last unimproved components of crop yield, this amount of genetic variation for photosynthesis forms  
38 excellent input for breeding approaches. In these breeding approaches, the interactions with the  
39 environmental conditions should however be precisely assessed. Doing so correctly, allows us to tap into  
40 nature's solution to challenging environmental conditions.

## 41 **Introduction**

42 In natural habitats, plants are at complete mercy of the dynamic properties of the environmental  
43 conditions, which are highly dynamic even in agricultural systems. Especially photosynthesis is highly  
44 responsive to environmental conditions (Anderson *et al.*, 1995). Fluctuating light conditions determine the  
45 overall functioning of photosynthesis in crops to a large extent. Clouds passing by cause sudden drops in  
46 light intensity, while wind inside canopies causes sudden spikes in light intensity due to leaf movements  
47 (Kaiser *et al.*, 2018; Durand *et al.*, 2021). Photosynthesis is able to work efficiently at many different light  
48 intensities, yet adaptation to sudden changes to light intensity takes time. Under high light conditions, to  
49 avoid too much light reaching the photosystems, plants can dissipate this excess energy as heat in a  
50 process called non-photochemical quenching (NPQ). NPQ in higher plants can grossly be divided into two  
51 components, the so called rapidly relaxing ( $q_E$ ) and slowly relaxing ( $q_I$ ) components (Müller *et al.*, 2001).  
52 The  $q_E$  component is the result of energy-dependent quenching, while the  $q_I$  component is the result of  
53 photoinhibition, the xanthophyll cycle, state transitions and chloroplast movements (Cruz *et al.*, 2016).  
54 The fast response of NPQ to a change in light intensity relies on conformational changes in the light  
55 harvesting complex being disentangled from the reaction centres. While NPQ is a very dynamic process  
56 the relaxation of NPQ can be slow in high to low light transitions. This results in too much energy being  
57 dissipated as heat that could otherwise be used for photosynthesis. Modelling these losses in crops shows  
58 that this can result in a drop of CO<sub>2</sub> fixation of up to 30% (Zhu *et al.*, 2004).

59 Since the core photosynthetic machinery is rather conserved, little functional genetic variation is available,  
60 that can be used to improve photosynthetic functioning. As a result most improvement studies have  
61 focused on overexpressing, mutating or inserting genes known to be involved in the core mechanisms  
62 known to be involved in photosynthesis (Ort *et al.*, 2015). This is also true for improvements in NPQ

63 dynamics, where overexpression of genes has been shown to bring about conformational changes of the  
64 antenna complexes (Johnson *et al.*, 2008). Accelerating the NPQ relaxation in tobacco and soybean has  
65 been shown to result in 15% and 30% higher yields respectively (Kromdijk *et al.*, 2016; De Souza *et al.*,  
66 2022). The same approach in *Arabidopsis thaliana* and potato did not result in accelerated NPQ relaxation  
67 or changes in yields, showing that it is not a one-size-fits-all solution (Garcia-Molina and Leister, 2020;  
68 Lehretz *et al.*, 2022). Despite the relative absence of natural genetic variation in the core photosynthetic  
69 machinery, there is ample phenotypic variation for photosynthesis, implying there is standing genetic  
70 variation outside the core machinery. This is also true for NPQ dynamics, as quantitative trait loci (QTLs)  
71 are identified for NPQ in regions of the genome that do not include any of the known NPQ related genes  
72 (Poormohammad Kiani *et al.*, 2008; Jung and Niyogi, 2009; Wang *et al.*, 2017; Oakley *et al.*, 2018a;  
73 Rungrat *et al.*, 2019; Goto *et al.*, 2021). Unfortunately, in hardly any of these cases the causal genes have  
74 been revealed, even though identifying the genes underlying QTLs opens up novel targets for improving  
75 the dynamic responses of NPQ, as well as forming an opportunity to expand the physiological understanding  
76 of NPQ (Theeuwens *et al.*, 2022b).

77 Whether the identified QTLs in any of the previous studies captured all the genetic variation for NPQ present  
78 within the population is difficult to assess. To reveal all genetic variation within a population, the choice of  
79 mapping populations and the high-throughput phenotyping systems are critical. Currently, genome wide  
80 association studies (GWAS) are the preferred approach to reveal novel QTLs for a trait of interest. GWAS  
81 are often considered successful when they reveal one or two QTLs. However, due to the need for correction  
82 for multiple testing, false positives are difficult to distinguish from true positives. GWAS are also known for  
83 their poor statistical power to detect the effects of rare alleles. The difficulty in revealing true positives and  
84 poor statistical power results in only a fraction of the QTLs present within the population being revealed  
85 (Theeuwens *et al.*, 2022b). Alternatively bi- or multiparental mapping populations can be used. These  
86 populations generally segregate for less genetic variants, in comparison to populations used in GWAS. In  
87 bi- or multiparental mapping populations any allele segregates at roughly equal ratios, increasing statistical  
88 power to detect QTLs. This results in more QTLs being detected and thus generates a better overview of  
89 how much natural genetic variation for NPQ is present within the population. Revealing natural genetic  
90 variation for NPQ also depends on the high-throughput phenotyping method used. To follow NPQ as it  
91 dynamically responds to changes in environment, continuous phenotyping of the entire mapping population  
92 is required (Murchie *et al.*, 2018; Bezouw *et al.*, 2019). Combining the benefits of revealing more QTLs via  
93 a bi- or multiparental populations with controlled dynamic environment phenotyping facilities allows us to  
94 reveal how natural genetic variation for dynamic photosynthesis manifests itself.

95 The *A. thaliana* accession Ely is known to possess a mutation in the chloroplast encoded *PsbA* gene (El-  
96 Lithy *et al.*, 2005), but here we discovered the nuclear counterpart of this accession to have a more efficient  
97 NPQ mechanism. To reveal the underlying nuclear genetic variation for the observed differences in NPQ, a  
98 large doubled haploid population between Ely and the common reference genotype Col was constructed.  
99 QTL mapping was done with phenotypes collected in a dynamic environment high-throughput phenotyping  
100 system. Subsequent candidate gene validation of two QTLs revealed novel physiological insights in dynamic  
101 photosynthetic properties.

## 102 Results

### 103 Revealing an efficient NPQ mechanism

104 The *A. thaliana* accession Ely is known to carry a *PsbA* mutation in the chloroplast genome, but the large  
105 phenotypic effect of the *PsbA* mutation masks possible variation for photosynthesis encoded in the nuclear  
106 genome. Separating the phenotypic response associated with the mitochondrial and chloroplast genomes  
107 (i.e. the plasmotype) from the phenotypic response associated with the nuclear genome (i.e. the  
108 nucleotype) is difficult. Recently, a quick and efficient method to make cybrids was developed (Flood &  
109 Theeuwes *et al.*, 2020). Cybrids are novel combinations between the nucleotype of one accession with the  
110 plasmotype of another accession. A previously constructed cybrid panel of seven *A. thaliana* accessions,  
111 including the Ely accession, enables the separation of the nucleotype effect of Ely from the *PsbA* mutation.  
112 Flood & Theeuwes *et al.*, 2020 grew the cybrid panel in a high-throughput phenotyping system able to  
113 simulate dynamic environmental conditions, in both stable and fluctuating light conditions (Figure 1A).  
114 Here, we reanalysed the phenotypic data and find that the cybrids with the Ely *PsbA* mutation differ  
115 significantly from cybrids with wild-type *PsbA* allele in both stable and dynamic light conditions for all  
116 measured photosynthetic parameters ( $\Phi_{PSII}$ ,  $\Phi_{NPQ}$ ,  $\Phi_{NO}$ , NPQ,  $q_E$  and  $q_i$ ) (Figure 1B and Supplementary  
117 Figure 1). The biggest reduction in NPQ between the cybrids with the *PsbA* mutation and without occurred  
118 during highly fluctuating light conditions (Figures 1B). However, the NPQ of Ely<sup>Ely</sup> (noted as  
119 Nucleotype<sup>Plasmotype</sup>) was found to be comparable to Col<sup>Col</sup>, even though the Ely<sup>Ely</sup> genotype has the  
120 plasmotypic *PsbA* mutation (Figure 1C). This compensation is caused by the Ely nucleotype, which results  
121 in up to 28.6% higher NPQ in comparison to the Col nucleotype (Figure 1C). This means that we revealed  
122 the Ely nucleotype to have a different capacity to do NPQ compared to the other nucleotypes.

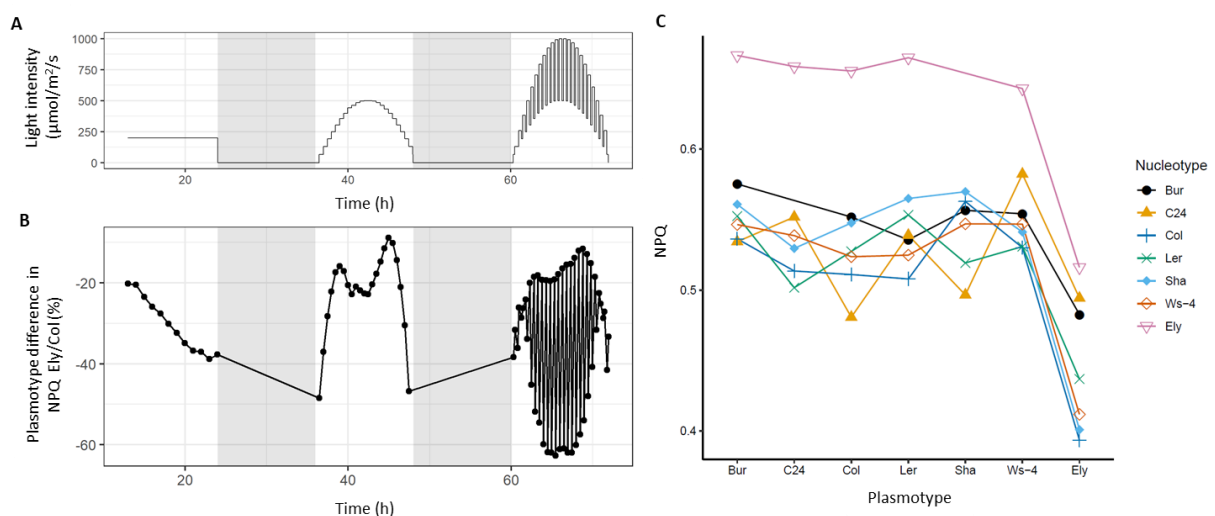

123

124 **Figure 1. Separating the NPQ phenotypic effects associated with the nucleotype and**  
125 **plasmotype.** A) Dynamic light intensity regime as the plants were exposed to, after 21 days growth at  
126  $200 \mu\text{mol m}^{-2} \text{s}^{-1}$ . B) The difference in NPQ between cybrids with the Ely plasmotype compared to the Col  
127 plasmotype. The averages were taken over all nucleotypes. All datapoints are negative, meaning the Ely  
128 plasmotype has lower NPQ. C) NPQ for all cybrids, at the biggest high to low light transition (at 67 hours  
129 in Figure 1A).

130 To understand the physiological impact of the difference in NPQ between the Ely and Col nucleotide, we  
131 further examined the photosynthetic responses under different light conditions. Besides the Ely plasmotype  
132 causing the biggest reduction in NPQ in fluctuating light conditions (Figure 1B), also the Ely nucleotide  
133 causes significant differences during fluctuating light conditions (Figure 2B and Supplementary Figure 2).  
134 During fluctuating light conditions, NPQ is affected most by the Ely nucleotide in comparison to the Col  
135 nucleotide in the high to low-light transition compared to the other nucleotypes (Figure 1C). To assess  
136 how an increasing light intensity affects the NPQ response after a high to low-light transition, we zoom in  
137 to the low light intensity measurements on the first half of the fluctuating light day (from 60 h till 67 h in  
138 Figure 2A). Here we observe that the Ely nucleotide has lower NPQ when  $\Phi_{\text{PSII}}$  is relatively efficient, whilst  
139 the NPQ is higher when  $\Phi_{\text{PSII}}$  becomes more inefficient (Figure 2C). Even though this effect is most  
140 pronounced after the high to low-light transitions, it is also observable after the low to high-light transitions  
141 (Supplementary Figure 3). As NPQ is a measure of capacity, it does not mean that the flux of NPQ ( $\Phi_{\text{NPQ}}$ )  
142 is different. Though we observe that also  $\Phi_{\text{NPQ}}$  is higher when  $\Phi_{\text{PSII}}$  is less efficient (Figure 2D). This shows  
143 that the Ely nucleotide encodes a more efficient NPQ mechanism in fluctuating light conditions.

144 NPQ is determined by the fast-responding component called  $q_E$  and the slow responding component called  
145  $q_I$ . To determine which of the two components contributes most to the difference in NPQ, as observed  
146 between the Ely and Col nucleotide, we calculate the contributions of each component. The biggest  
147 difference was observed after the light transition from  $924 \mu\text{mol m}^2 \text{s}^{-1}$  to  $483 \mu\text{mol m}^2 \text{s}^{-1}$ , where the Ely  
148 nucleotide shows 28.6% higher NPQ compared to the Col nucleotide. The average NPQ for the Col and  
149 Ely nucleotypes at this moment consists of 34.5% and 65.5% of  $q_E$  and  $q_I$  respectively. This shows  $q_I$  is a  
150 bigger component of NPQ in these conditions. However, the relative increase in Ely as compared to Col for  
151  $q_E$  is 50.1% while for  $q_I$  this is 18.5%, indicating that  $q_E$  contributes more to the increased NPQ effect  
152 induced by the Ely nucleotide. Plotting  $q_E$  and  $q_I$  against the inefficiency of PSII, indeed shows  $q_E$  to  
153 resemble the response of NPQ to  $\Phi_{\text{PSII}}$  (Supplementary Figure 3). Assessing the ability of the Ely nucleotide  
154 to cause faster relaxation of NPQ, via  $q_E$ , is difficult with all measurements being taken 18 minutes after a  
155 high light intensity period, which is too late to assess the capacity of increased  $q_E$ .

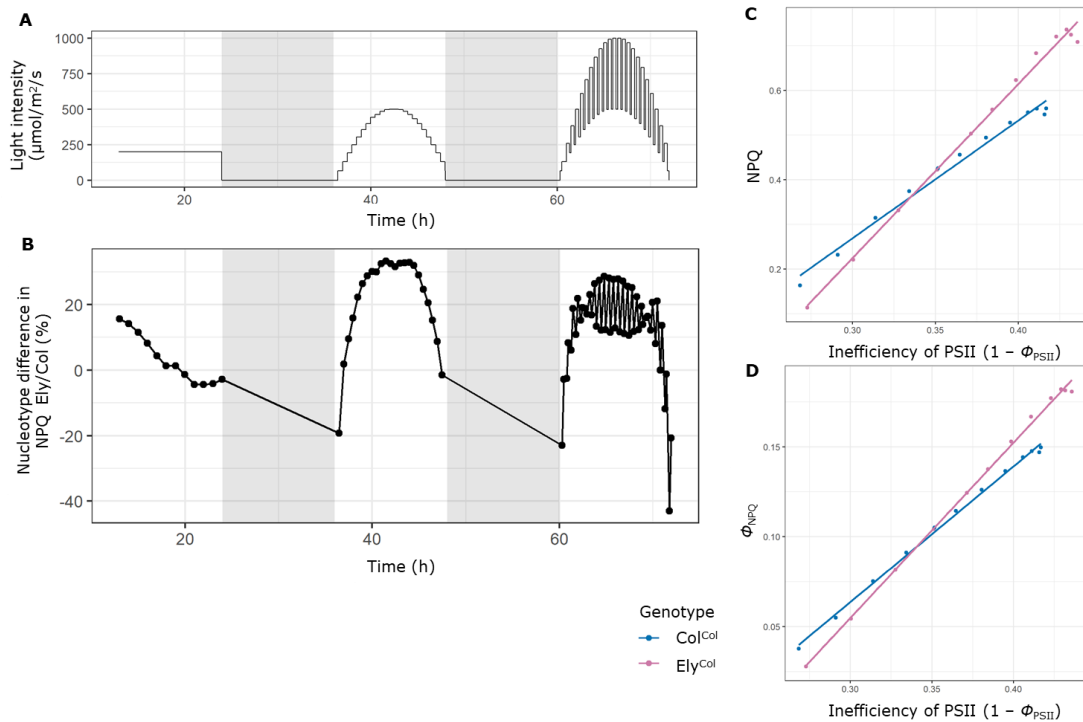

156

157 **Figure 2. Differences in NPQ capacity and flux between *Col* and *Ely* nucleotypes.** A) Fluctuating  
 158 light conditions as the plants were exposed to, after 21 days growth at  $200 \mu\text{mol m}^2 \text{s}^{-1}$ . B) The difference  
 159 in NPQ between cybrids with the *Ely* nucleotype compared to the *Col* nucleotype. The average was taken  
 160 over all plasmotypes. Positive datapoints show the *Ely* nucleotype has higher NPQ, negative datapoints  
 161 show the *Ely* nucleotype has lower NPQ. C) NPQ plotted against the inefficiency of PSII. The measurements  
 162 are taken 18 minutes after a high to low-light transition, with light intensities as show in panel A from 60  
 163 to 67 hours. The low to high-light transition is visualized in Supplementary Figure 3. D) Same as for panel  
 164 C, but plotted for  $\Phi_{\text{NPQ}}$  plotted against the inefficiency of PSII.

165 To monitor the difference in  $q_E$  between the *Ely* and *Col* nucleotypes, we phenotyped the relaxation of NPQ  
 166 in more detail, after a high to low-light transition. *Ely*<sup>Col</sup> and *Col*<sup>Col</sup> cybrids were exposed to short fluctuating  
 167 light conditions (alternating between  $1000 \mu\text{mol m}^2 \text{s}^{-1}$  and  $100 \mu\text{mol m}^2 \text{s}^{-1}$ ) followed by measuring NPQ  
 168 during 5 minutes of  $50 \mu\text{mol m}^2 \text{s}^{-1}$ . At the end of the high light intensity period ( $1000 \mu\text{mol m}^2 \text{s}^{-1}$ ), *Ely*<sup>Col</sup>  
 169 showed higher NPQ compared to *Col*<sup>Col</sup> (Figure 3A). This observation is in line with the earlier observations  
 170 of higher NPQ due to the *Ely* nucleotype (Figure 2B). By normalizing the data to the starting NPQ  
 171 measurement, during the entire 5 minutes NPQ is significantly lower in the *Ely* compared to *Col* nucleotypes  
 172 (Figure 3B). In the first 100 seconds NPQ in *Ely* shows an average reduction of 13.2% compared to the  
 173 *Col* nucleotype (Figure 3B). The experiment was repeated to monitor the NPQ relaxation in a high-light to  
 174 darkness transition. *Ely*<sup>Col</sup> revealed faster relaxation of NPQ in darkness (Figures 3C and 3D), in line with  
 175 the faster relaxation of NPQ during low light intensities (Figures 3A and 3B). All results together, show that  
 176 the *Ely* nucleotype possesses a more efficient NPQ mechanism in conditions where  $\Phi_{\text{PSII}}$  is less efficient,  
 177 and this coincides with the ability to respond more dynamically to fluctuating light conditions as compared  
 178 to *Col*.

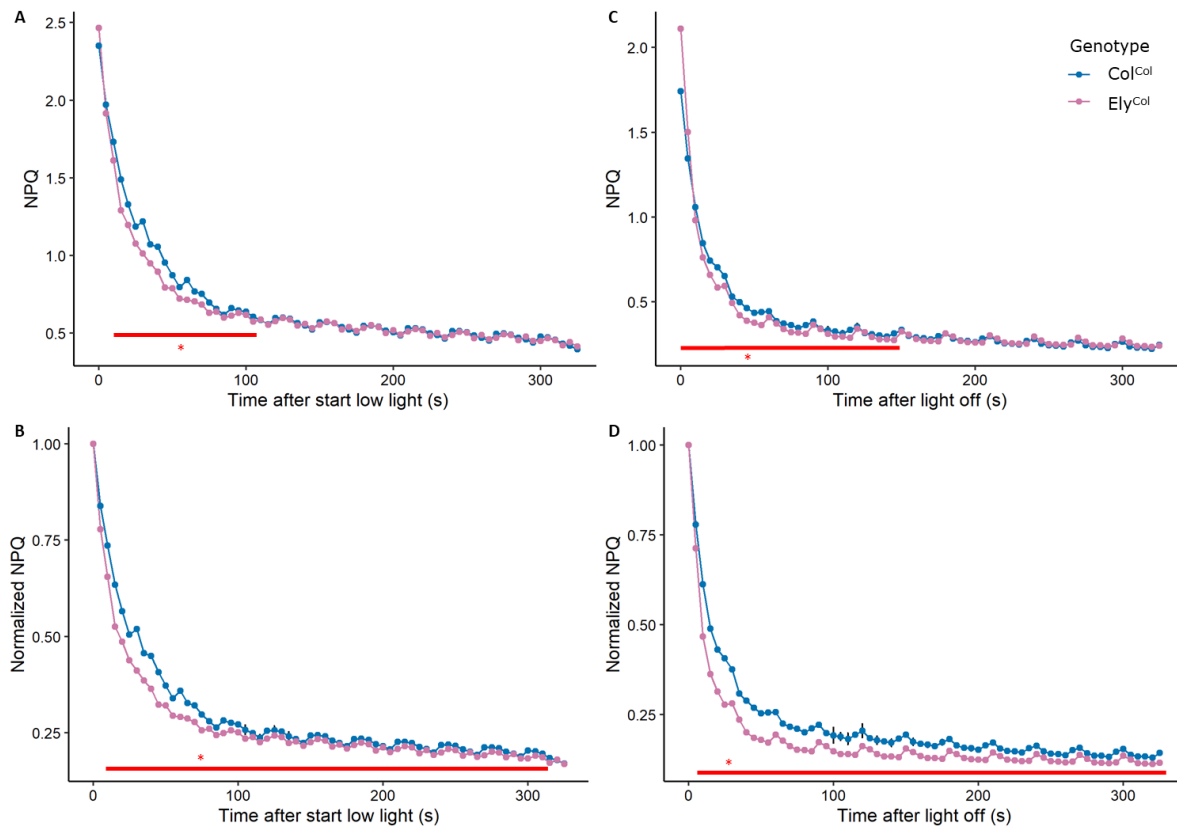

179

180 **Figure 3. NPQ relaxation of the Ely versus Col nucleotype after fluctuating light conditions.** The  
181 fluctuating light conditions were five times a three minutes period with 1000, 100, 1000, 100, 1000  $\mu\text{mol}$   
182  $\text{m}^2 \text{s}^{-1}$ , and at  $t = 0 \text{ s}$  light intensity was switched to 50  $\mu\text{mol} \text{m}^2 \text{s}^{-1}$  (shown in panel A and B) and to  
183 darkness (shown in panel C and D). Panels A and C show absolute NPQ measurements, while panels B and  
184 D show NPQ normalized to the  $t = 0 \text{ s}$  measurement. The red line indicates significant differences between  
185 the nucleotypes with  $n=10$ .

### 186 Identifying the causal QTLs

187 Knowing which alleles are causal to the observed difference in capacity and flux of NPQ will help to  
188 understand the underlying physiological or biochemical mechanism. NPQ could be higher and more dynamic  
189 as a result of the formation of quenching sites in the light harvesting complexes influenced by PsbS and  
190 the xanthophyll cycle (Ruban, 2017; Kromdijk and Walter, 2022). The xanthophyll cycle is catalysed by  
191 the enzymes VDE and ZEP. We first determined whether there is genetic variation within the genes  
192 encoding PsbS, VDE or ZEP, that could explain the observed differences in NPQ. This revealed no non-  
193 synonymous variants or impactful INDELS in the genes encoding PsbS, VDE or ZEP. In the absence of  
194 genetic variation that may have caused gene expression differences or changes to the protein, we conclude  
195 that variant in a different gene (or genes) must be causal.

196 To identify the causal gene(s) and allele(s) to the difference in NPQ, we constructed a doubled haploid  
197 (DH) population between Col<sup>Col</sup> and Ely<sup>Col</sup>. A DH population is the quickest approach to generate a genetic  
198 mapping population of homozygous lines in *A. thaliana*. The population consisting of 449 DH lines  
199 segregating between Col<sup>Col</sup> and Ely<sup>Col</sup>. Low coverage whole genome sequencing and a custom analysis  
200 pipeline were used to genotype the DH population (see Materials and Methods). The genotyping resulted

201 in a high resolution marker dataset with 478 markers equally spread over the genome with a resolution of  
202 250 Kbp (Supplementary Data 1). On average six cross overs per DH line were observed (Supplementary  
203 Figure 4), so we concluded the DH population formed an excellent starting point to reveal the QTLs involved  
204 with the observed difference in NPQ.

205 To identify the QTLs responsible for the observed differences in NPQ, the DH population was phenotyped  
206 using two separate high-throughput chlorophyll fluorescence phenotyping systems. One experiment was  
207 designed to provide fluctuating light conditions and the other was designed to provide stable light  
208 conditions. In the previous experiment with cybrids, the NPQ difference between the Col and Ely  
209 nucleotypes was found to depend on fluctuating light conditions (Figure 2B). The broad sense heritability  
210 ( $H^2$ ) of the segregating DH population was also found to depend on the light conditions. For NPQ we  
211 observed an average  $H^2 = 0.25$  and in fluctuating light conditions this went up to  $H^2 = 0.54$ , indicating a  
212 strong genotype by environment interaction (Supplementary Figure 7). QTL mapping for NPQ throughout  
213 the fluctuating light conditions revealed a plethora of QTLs (Figure 4). The majority of QTLs are associated  
214 with a specific time of the day, light intensities, sequence of fluctuating light conditions or even adaptation  
215 to light conditions. Using a naive Bonferroni threshold (LOD score of 4.8), 15 different QTLs for NPQ can  
216 be observed (Figure 4). QTL mapping for  $\Phi_{PSII}$ ,  $\Phi_{NPQ}$ ,  $\Phi_{NO}$ ,  $q_E$  and  $q_I$  identified, next to several shared QTLs,  
217 specific QTLs associated with these photosynthetic parameters (Supplementary Figures 8 and 9). In the  
218 high-throughput phenotyping system with stable low light conditions ( $200 \mu\text{mol m}^{-2} \text{s}^{-1}$ ), three QTLs for  
219  $\Phi_{PSII}$  were identified that had not been observed in the fluctuating light experiment (Supplementary Figure  
220 10). Altogether, this shows that there is variation for several physiological mechanisms associated with  
221 photosynthetic performance in this population, all of which is dependent on the environmental conditions.

222 The results also show that at a specific timepoint for a specific photosynthetic parameter, several QTLs can  
223 be observed with opposing effects (Figure 4). As an example, at a single timepoint ( $t = 86 \text{ h}$ ) on a day  
224 with a stable light intensity ( $200 \mu\text{mol m}^{-2} \text{s}^{-1}$ ) in between days with fluctuating light conditions, four QTLs  
225 for NPQ can be observed (Supplementary Figure 11). Underlying two of these QTLs the Ely allele results in  
226 a higher NPQ (a QTL on chromosome 1 at 25.75 Mbp, noted as QTL-1<sup>25,750</sup>, and QTL-5<sup>21,750</sup> bring about  
227 12.7% and 12.1% higher NPQ respectively). In the other two QTLs the Col allele results in higher NPQ  
228 (QTL-1<sup>12,250</sup> and QTL-4<sup>12,250</sup> bring about 17.2% and 22.5% higher NPQ respectively). QTLs with opposing  
229 effects indicate that the two accessions are likely to use different physiological mechanisms to get to,  
230 roughly, the same phenotypic response.

231



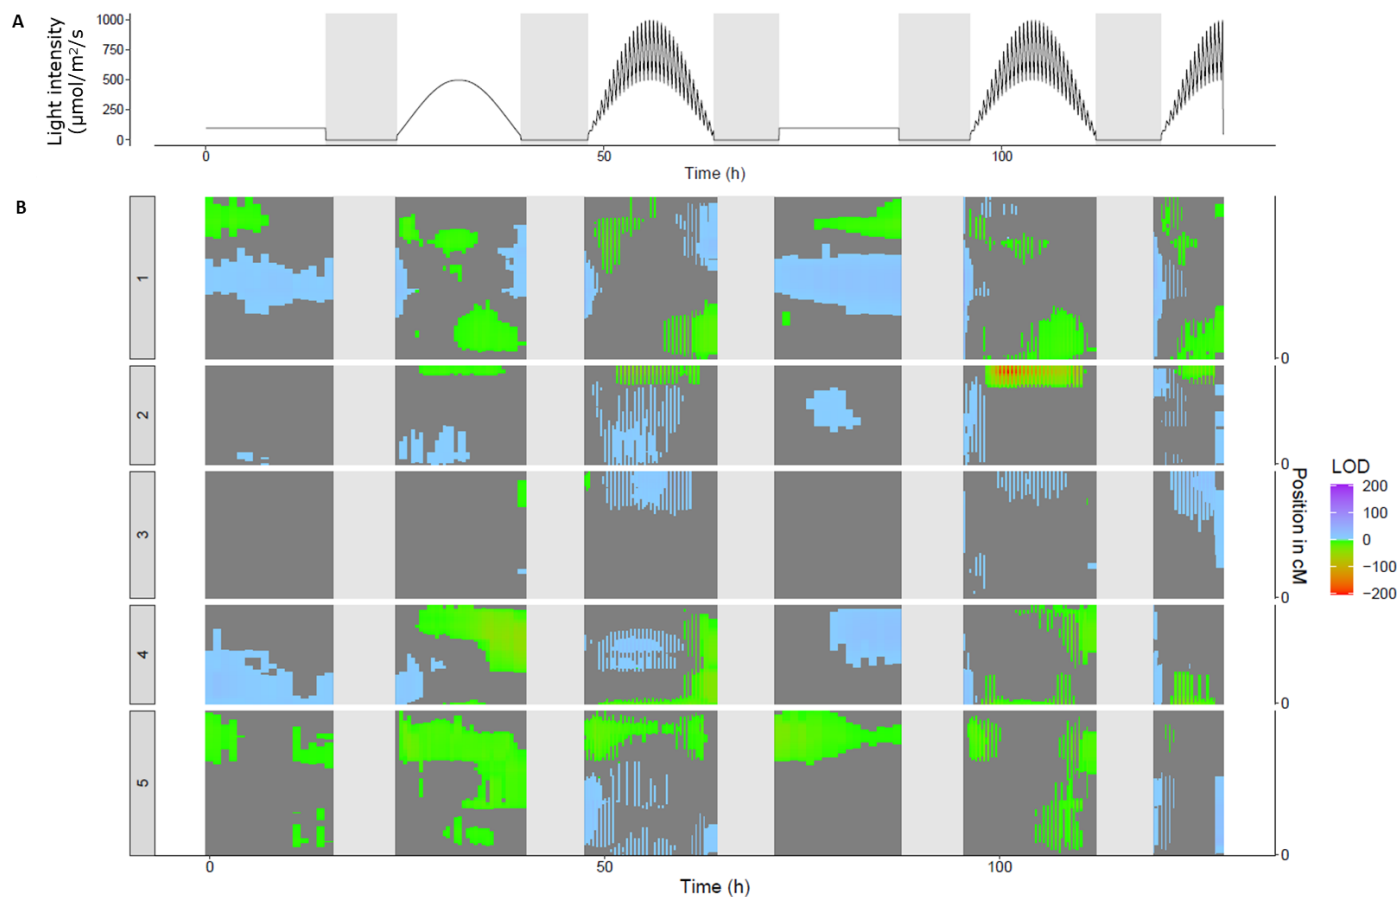

232

233 **Figure 4. QTL mapping on NPQ using the DH population in both stable and fluctuating light conditions.** A) Represents the light intensities during the  
 234 experiment, where  $t = 0$  h is the moment when lights turned on, day 21 after sowing. In the first 21 days plants were grown at a light intensity of  $200 \mu\text{mol m}^2 \text{s}^{-1}$ .  
 235 B) Vertical representation of QTL mapping over time, the times match the light intensities are shown in panel A. LOD scores are represented in positive values if  
 236 the effect size of the *Ely* allele of a given marker on that time point is higher as compared to *Col* allele. Negative values are given when the *Ely* allele induces a lower  
 237 effect as compared to *Col*. The dark grey background indicates markers that do not pass a naive Bonferroni threshold (LOD threshold of 4.8).

238 The difference in NPQ as originally observed between the Col and Ely nucleotide was most pronounced in  
239 high to low-light transitions (Figure 2). To unravel the underlying genetics, we investigated the two largest  
240 contributing QTLs in the fluctuating light conditions. The first QTL is located on chromosome 2 at position  
241 18.5 Mbp, referred to as QTL-2<sup>18,500</sup>. During fluctuating light conditions, QTL-2<sup>18,500</sup> causes up to 17.5%  
242 higher NPQ and 36.3% higher  $q_E$ , when homozygous for the Ely allele (Figure 5A). To reveal how the alleles  
243 underlying QTL-2<sup>18,500</sup> affect NPQ at different efficiencies of PSII in fluctuating light, the two parameters  
244 were plotted against each other. The Ely allele underlying QTL-2<sup>18,500</sup> shows an increased capacity of NPQ  
245 when PSII is more inefficient (Figure 5D). This resembles the pattern as observed in the parental lines,  
246 and we therefore consider QTL-2<sup>18,500</sup> to explain a substantial part of the differences in NPQ as observed  
247 between the Col and Ely nucleotide in the high to low-light transition. Strikingly, QTL-2<sup>18,500</sup> is absent in  
248 low stable light conditions (200  $\mu\text{mol m}^{-2} \text{s}^{-1}$ ), meaning that the causal allelic variation does not play a role  
249 in such low stable light conditions (Figure 4). During the second day of fluctuating light conditions, the Ely  
250 allele of QTL-2<sup>18,500</sup> has a larger effect, in comparison to the first fluctuating light day, implying that the  
251 underlying mechanism is adapting to the environmental conditions (Figure 6B). In the high to low-light  
252 transition when the NPQ effect is largest,  $\Phi_{\text{PSII}}$  is reduced with 3.4%, which is in line with higher NPQ when  
253 PSII is less efficient (Figure 6C).

254 At the time point at which the difference between the alleles underlying QTL-2<sup>18,500</sup> is the largest, the Ely  
255 allele of another QTL confers 4.7% higher NPQ than the Col allele. This QTL is located on chromosome 4  
256 at position 250 Kbp, and is referred to as QTL-4<sup>0.25</sup> (Figure 5A). QTL-4<sup>0.25</sup> is present in stable low light  
257 conditions as well as fluctuating light conditions (Figure 4 and Supplementary Figure 10). Throughout the  
258 experiment, the Ely allele can be seen to confer a difference in NPQ ranging between 24.8% higher and  
259 9.5% lower compared to the Col allele (Figure 6D). Also,  $\Phi_{\text{PSII}}$  is found to depend on the light conditions,  
260 with the Ely allele conferring up to 5.4% lower  $\Phi_{\text{PSII}}$  compared to the Col allele (Figure 6E). However, both  
261 alleles underlying QTL-4<sup>0.25</sup> at any given  $\Phi_{\text{PSII}}$  have the same NPQ phenotype (Figure 5E), in contrast to  
262 QTL-2<sup>18,500</sup>, that did show a difference in NPQ (Figure 5D). Analysing the combined effect of the alleles  
263 underlying the two QTLs, shows that for  $\Phi_{\text{PSII}}$ , both QTLs have an equal effect, regardless of the alleles  
264 underlying the other QTL (Figure 5C). Doing this for NPQ; when a plant has the Ely allele underlying QTL-  
265 2<sup>18,500</sup>, the presence of the Ely allele underlying QTL-4<sup>0.25</sup> increases NPQ only by 0.6%. While doing the  
266 same conversion with the Col allele for QTL-2<sup>18,500</sup>, alleles underlying QTL-4<sup>0.25</sup> caused a 6.2% increase  
267 (Figure 5B). Therefore, for NPQ the alleles underlying the two QTLs are in an epistatic relation ( $p = 8.21\text{E-}$   
268 5). This shows that the physiological processes caused by the alleles underlying the two QTLs are  
269 independent.

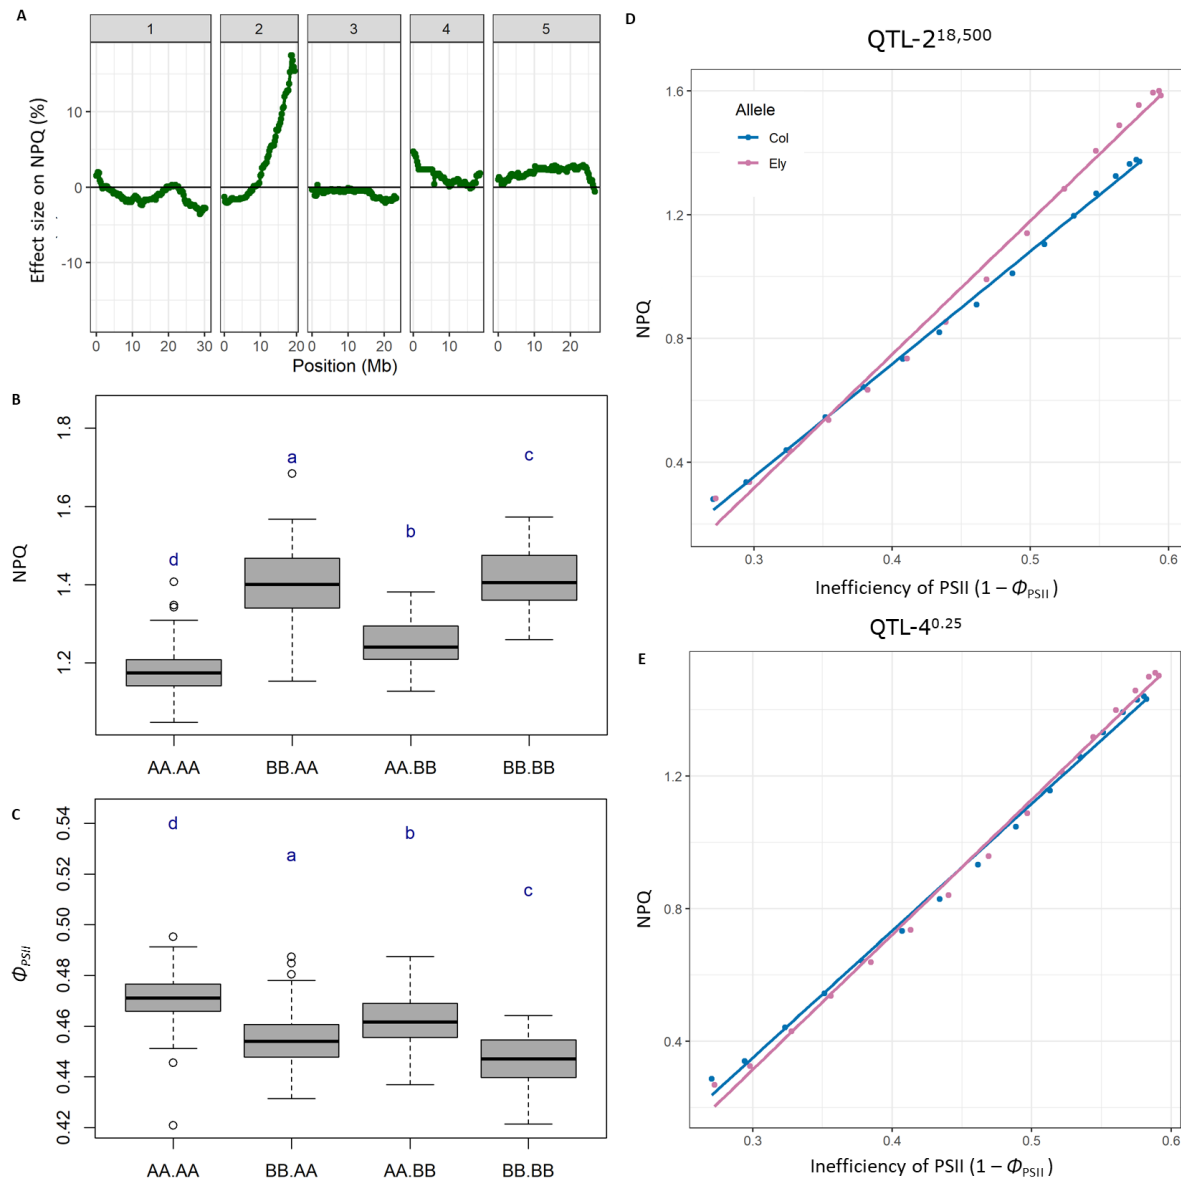

270

271 **Figure 5. Phenotypic effects of QTL-2<sup>18,500</sup> and QTL-4<sup>0.25</sup> on  $\Phi_{PSII}$  and NPQ.** A) Shows what the effect  
 272 of the Ely or Col allele at a certain position on the *A. thaliana* genome is on NPQ. The effect size is  
 273 normalized to the Col allele, so a positive effect size is higher NPQ conferred by the Ely allele. The x axis  
 274 shows the position (in Mbp) on the five chromosomes of *A. thaliana*. B and C) Phenotypic effects of the  
 275 alleles underlying QTL-2<sup>18,500</sup> and QTL-4<sup>0.25</sup> on  $\Phi_{PSII}$  and NPQ. The phenotypes are given at the timepoint  
 276 when the difference between the Ely and Col nucleotide was largest, in the middle of the second fluctuating  
 277 light day, at 101 h into the experiment (Figure 4A). The phenotypic effects are given for all homozygous  
 278 combinations between QTL-2<sup>18,500</sup> and QTL-4<sup>0.25</sup>, with the two left letters representing QTL-2<sup>18,500</sup> and the  
 279 two right letters representing QTL-4<sup>0.25</sup>. The "A" allele refers to the Col allele, and the "B" allele refers to  
 280 the Ely allele of both QTLs. The letters represent significant differences, with Tukey correction for multiple  
 281 testing ( $\alpha = 0.05$ ). D) The NPQ effect of the Col and Ely allele underlying QTL-2<sup>18,500</sup> plotted against the  
 282 inefficiency of PSII. The measurements are taken 18 minutes after a high to low-light transition. The  
 283 measurements are taken from the second day with fluctuating light conditions, from 96 to 102 h (Figure  
 284 4A). E) Same as panel D, but for the alleles underlying QTL-4<sup>0.25</sup>.

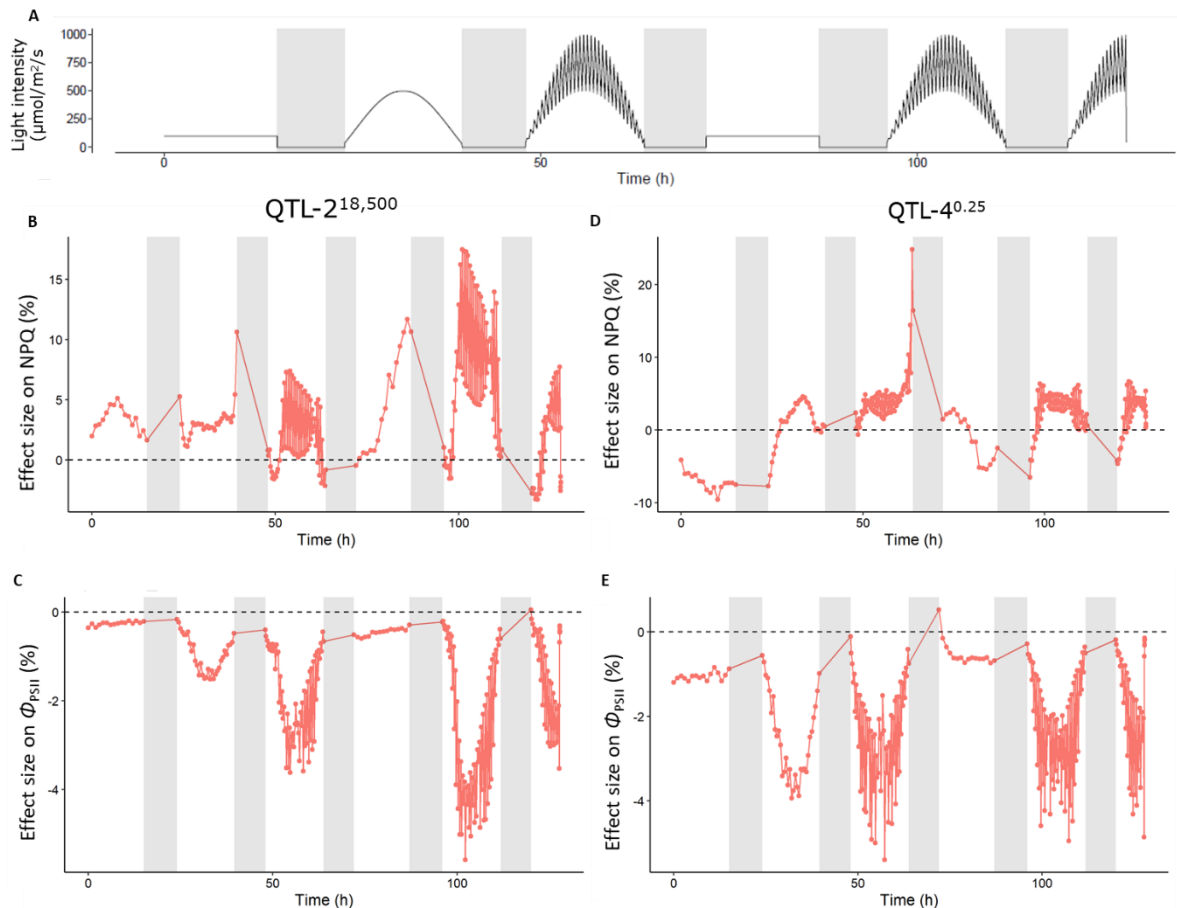

285

286 **Figure 6. Phenotypic effect sizes of QTL-2<sup>18,500</sup> and QTL-4<sup>0.25</sup> on Φ<sub>PSII</sub> and NPQ.** A) Represents the  
287 light intensities during the experiment, where  $t = 0$  h is the moment when lights turned on, day 21 after  
288 sowing. In the first 21 days plants were grown at a light intensity of  $200 \mu\text{mol m}^{-2} \text{s}^{-1}$ . B) Effect size of  
289 alleles underlying QTL-2<sup>18,500</sup> on NPQ with Col as reference. C) Effect size of alleles underlying QTL-4<sup>0.25</sup> on  
290 NPQ with Col as reference. D) Effect size of alleles underlying QTL-2<sup>18,500</sup> on Φ<sub>PSII</sub> with Col as reference. E)  
291 Effect size of alleles underlying QTL-4<sup>0.25</sup> on Φ<sub>PSII</sub> with Col as reference. In panels A – E) the effect size  
292 matches the light intensities shown in panel A.

### 293 Fine mapping and gene confirmation

294 To reveal the physiological mechanisms conferred by the alleles underlying the two QTLs, the causal genes  
295 should be identified. Thus, we performed various fine mapping approaches and gene candidate validations  
296 for both QTLs. QTL-2<sup>18,500</sup> showed the highest association at 18.5 Mbp on chromosome 2, but due to the  
297 high association and relatively large linkage disequilibrium, the QTL is wide (Figure 7A). On both sides of  
298 QTL-2<sup>18,500</sup>, we used the recombination sites within two individual DH lines that were closest to the marker,  
299 to determine the size of the QTL. Using this definition, QTL-2<sup>18,500</sup> stretched from 18,612,500 to 18,862,500  
300 bp – i.e the size is 250 Kbp. To remove other QTLs that can interfere with the phenotype of this QTL when  
301 doing fine mapping, we produced a range of 57 near-isogenic lines (NILs). All NILs had independent  
302 recombinations in the QTL region of 250 Kbp. These recombinants were phenotyped in the same way as  
303 the original DH population, and the QTL mapping showed the highest association on 18,861,385 bp (Figure  
304 7B). Again, using the recombination sites within two individual fine mapping lines, on both sides, closest

305 to 18,861,385 bp, showed the region to span from 18,849,338 bp to 18,875,047 bp which is 25 Kbp in  
306 size.

307 There are nine genes annotated within the 25 Kbp region that contains the causal gene (Figure 7C). We  
308 analysed the genetic variation present within this region to find if any variant is expected to cause a  
309 difference in protein abundance or structure. Variant prediction and *de novo* sequencing of Ely shows four  
310 non-synonymous SNPs, one frameshift and two promotor deletions in six of these genes (Supplementary  
311 Table 1). A non-synonymous SNPs is a SNP in the predicted open reading frame of the gene, and a  
312 frameshift is an insertion or deletion that influences the reading frame, and both are expected to lead to a  
313 change in amino acid(s) of the encoded protein. To assess the effect of the promotor deletions on  
314 expression of the genes, we compared the expression of *PHOSPHOMANNOMUTASE* (*PMM*) and  
315 *CHLOROPLAST SIGNAL RECOGNITION PARTICLE FTSY* (*cpFtsY*) between Col and Ely, before and during  
316 fluctuating light (Supplementary Figure 14). This revealed no significant expression differences between  
317 Col and Ely for *PMM*. In the absence of a non-synonymous SNP this makes *PMM* an unlikely causal gene.  
318 Also, *cpFtsY* did not show a significant expression difference between Col and Ely. However, the presence  
319 of a non-synonymous SNP, and the previously determined role in incorporating light harvesting complexes  
320 into the thylakoid membrane (Durrett *et al.*, 2006; Tzvetkova-Chevolleau *et al.*, 2007), lead us to test this  
321 gene for causality first. A T-DNA insertion knock-out line of *cpFtsY* showed increased  $q_E$ , although not as  
322 high as the NIL for this QTL showed (Figure 7D). The genotype that is heterozygous for the remaining 25  
323 Kbp region shows the same  $q_E$  phenotype as the Col wildtype control, meaning the Ely allele is recessive  
324 (Figure 7D). Due to the Ely allele being recessive, we can test the complementary effect of the two different  
325 alleles in an  $F_1$  hybrid with the T-DNA insertion knock-out line, a test called quantitative allelic  
326 complementation. In these  $F_1$  hybrids, we saw that the Ely allele is not able to complement the *cpFtsY*  
327 knock-out mutant phenotype, as seen with the Col allele, hence we can conclude that *cpFtsY* is the likely  
328 causal gene explaining the increased NPQ capacity when  $\Phi_{PSII}$  is inefficient (Figure 7E).

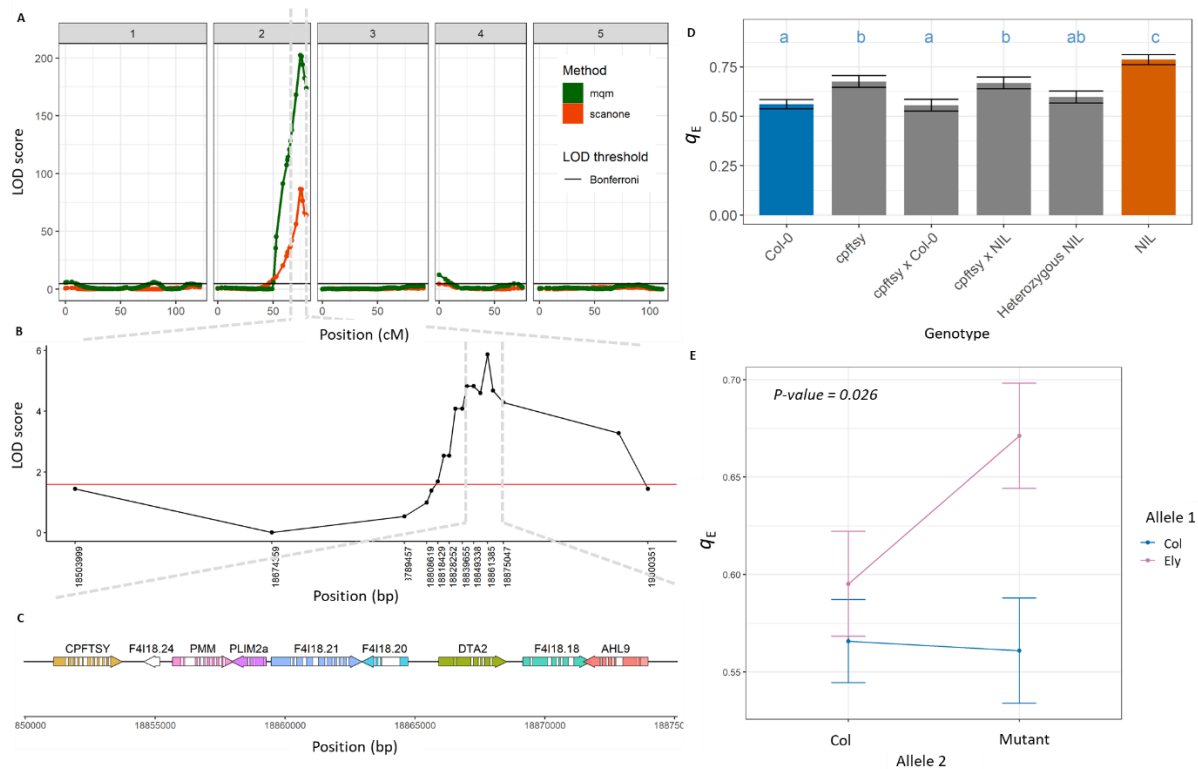

329

330 **Figure 7. QTL mapping, fine mapping and quantitative allelic complementation studies to**  
 331 **identify the causal genes underlying QTL-2<sup>18,500</sup>** A) The QTL map of the DH population for NPQ during  
 332 fluctuating light at timepoint 101 h after the start of the experiment. The LOD threshold is based on a  
 333 naive Bonferroni correction, here established at 4.8. B) The QTL map of the fine mapping population,  
 334 consisting of 57 recombinants in a 250 Kbp region around the QTL. C) Genes annotated within the QTL  
 335 region of 25 Kbp. D)  $q_E$  102 h into the experiment, of Col-0, cpftsY and the NIL, and F<sub>1</sub> hybrids between  
 336 these. The NIL is coloured orange in line with Figure 9. E) Quantitative allelic complementation identifying  
 337 cpFtsY as the causal gene underlying QTL-2<sup>18,500</sup>. Allele 1 is either the Col or knock-out allele, and Allele 2  
 338 is either the Col or Ely allele, in the F<sub>1</sub> hybrids. In all cases significance is displayed as letters, with a Tukey  
 339 multiple correction ( $\alpha = 0.05$ ).

340 For QTL-4<sup>0.25</sup>, we had to take into account the, well-studied, inversion on top of chromosome 4 (Fransz *et*  
 341 *al.*, 2016) (Figure 8A). Using the genetic map and the *de novo* sequence of Ely we could establish that  
 342 QTL-4<sup>0.25</sup> is 1.25 Mbp away from this inversion (Supplementary Figures 5 and 12), and therefore can be  
 343 assessed without taking the inversion into account. To determine the size of QTL-4<sup>0.25</sup>, we used the  
 344 recombination sites within two individual DH lines that were closest on both sides of the highest associated  
 345 marker. This resulted in a QTL spanning from 237.5 to 337.5 Kbp, meaning the causal gene is located  
 346 within a 100 Kbp region. Three NILs were made with different recombination sites within the 100 Kbp  
 347 region (Figure 8B). Phenotyping these NILs for  $\Phi_{PSII}$  and using the recombination sites, showed that the  
 348 QTL is located between 260,617 bp to 324,150 bp, making the region containing the QTL 64 Kbp in size  
 349 (Figure 8B).

350 There are 11 genes annotated within the 64 Kbp region surrounding QTL-4<sup>0.25</sup> (Figure 8C). With the highest  
 351 association in the QTL mapping of the DH population being at 267,500 bp, we first focused on the genes  
 352 around this position. Position 267,500 bp is located 1,401 bp upstream of the annotated position of the

353 flowering time gene *FRIGIDA* (*FRI*). Ely has an active allele and Col has a knock-out allele of *FRI*, meaning  
 354 these alleles segregate within the DH population. *FRI* is known for many pleiotropic effects, and thus the  
 355 allelic differences between Col and Ely could explain the difference in  $\Phi_{PSII}$ . To test the role of *FRI*, we used  
 356 a late-flowering Col genotype with the functional allele of *FRI* introgressed from Sf-2 (i.e. Col-*FRI*) (Lee *et al.*,  
 357 1993), and Col genotype with an active allele of *FRI* that is early flowering due to an *flc* knock-out (i.e.  
 358 Col-*FRI-flc3*). Noteworthy, a biparental population between Col and Sf-2 did not show a QTL on  
 359 chromosome 4 for NPQ, already suggesting that the difference between a knock-out and functional allele  
 360 of *FRI* are not causing the observed phenotypic difference (Jung and Niyogi, 2009). Phenotyping for  $\Phi_{PSII}$   
 361 showed that the Col-*FRI* genotype showed a small significant effect in comparison to the Col genotype  
 362 (Figure 8D). However, in the absence of significant effect between the Col-*FRI-flc3* and the Col genotype,  
 363 shows that the active allele of *FRI* cannot explain the phenotypic difference as caused by the alleles  
 364 underlying QTL-4<sup>0.25</sup> (Figure 8D). Independently of this, we phenotyped three recombinant inbred line  
 365 (RIL) populations derived from the crosses between Can-0 and Col, Sha and Col and Bur-0 and Col. Bur-  
 366 0, Sha and Can-0 all harbour the functional allele of *FRI* (Shindo *et al.*, 2005; Brachi *et al.*, 2010), and  
 367 thus if a functional *FRI* allele would explain the difference in  $\Phi_{PSII}$ , a QTL would be present on the top of  
 368 chromosome 4 for all three populations. As the RILs with Bur and Sha do not show a QTL on chromosome  
 369 4 (Supplementary Figure 13), we can exclude *FRI* as the causal gene of QTL-4<sup>0.25</sup>. Based on a gene function  
 370 analysis, the other likely candidate gene would be the *K<sup>+</sup> efflux antiporter 2* (*KEA2*). However, the  
 371 quantitative allelic complementation using the NILs showed that both alleles of QTL-4<sup>0.25</sup> were able to  
 372 complement the mutant in the same way (Figure 8F). This does not exclude *KEA2* as the causal gene, but  
 373 further experiments would have to prove it.

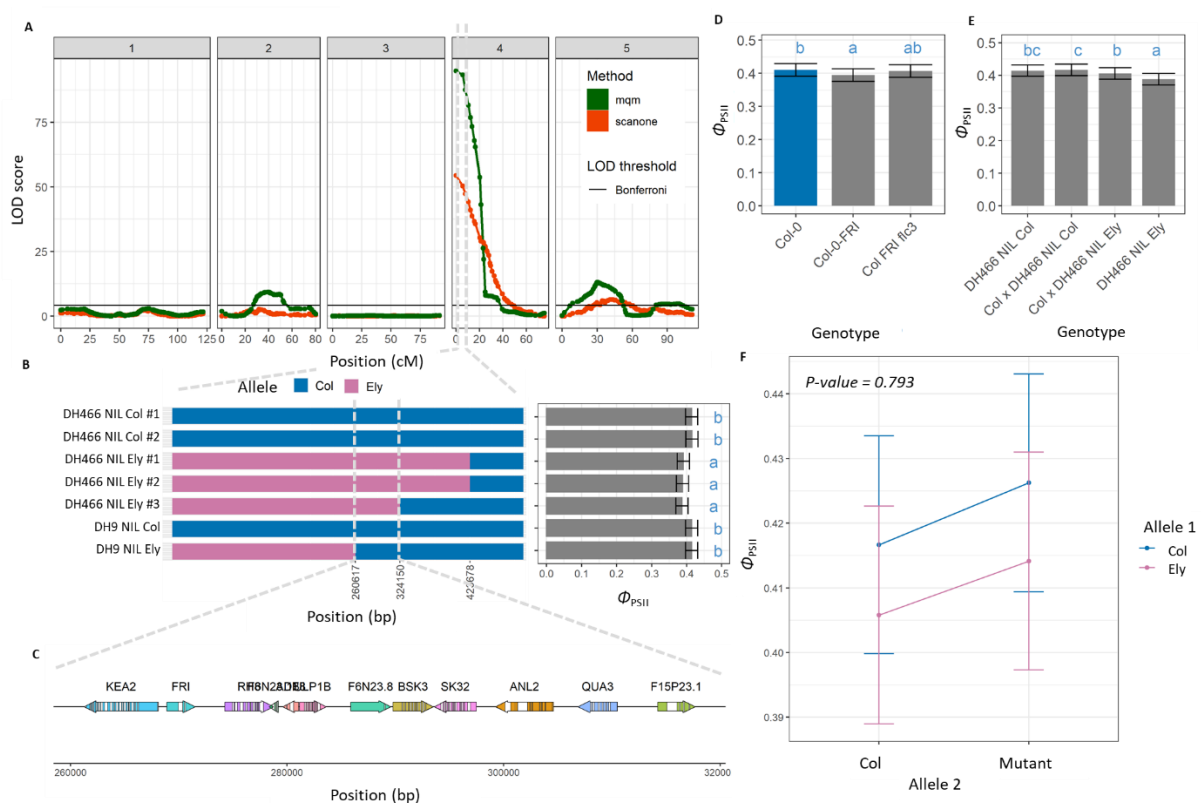

374

375 **Figure 8. QTL mapping, fine mapping and quantitative allelic complementation studies to**  
 376 **identify the causal genes underlying QTL-4<sup>0.25</sup>.** A) The QTL map of the DH population for  $\Phi_{PSII}$ , 1 h

15

377 into a high light intensity of  $500 \mu\text{mol m}^{-2} \text{s}^{-1}$ , after plants were grown for 18 days at  $200 \mu\text{mol m}^{-2} \text{s}^{-1}$ . LOD  
378 threshold is based on a naive Bonferroni correction, here placed at 4.1. B) The genotype of separate near-  
379 isogenic lines and their controls within the QTL region, and the associated  $\Phi_{\text{PSII}}$  phenotypes. C) Genes  
380 annotated within the QTL region of 64 Kbp. D) Phenotype of Col genotypes with different alleles for *FRI*  
381 and *FLC*, at the same time point as the original QTL mapping. E) Phenotypes of heterozygous NILs in  
382 comparison to the controls. F) Quantitative allelic complementation study for the *KEA2* gene. Allele 1 is  
383 either the Col or knock-out allele, and Allele 2 is either the Col or Ely allele, in the  $F_1$  hybrids. In all cases  
384 significance is displayed as letters, with a Tukey multiple correction ( $\alpha = 0.05$ ).

### 385 Physiological impact of the alleles

386 To understand how the observed differences in NPQ are caused by the studied QTLs, we sought to connect  
387 the gene function of the causal genes with more in-depth physiological insights. As for now we only know  
388 the causal gene for QTL-2<sup>18,500</sup>, we primarily focus on the physiological impact of the gene *cpFtsY*. The  
389 earlier observations that the Ely allele underlying QTL-2<sup>18,500</sup> results in higher engagement of NPQ when  
390  $\Phi_{\text{PSII}}$  is less efficient, can now be connected to the Ely allele of *cpFtsY* (Figures 2C and 2D). Assessing the  
391 effect of *cpFtsY* at different NPQ intensities shows that the Ely allele has lower  $1 - q_p$  when NPQ is higher  
392 (Figures 9A and 9B). A lower  $1 - q_p$  means the  $Q_A$  pool is more oxidized, which could lead to less damage  
393 to the reaction centra, and also less chlorophyll triplets being formed in the pigment bed.

394 Assessing the impact of higher engagement of NPQ on overall plant performance was done by growing  
395 three independent NILs containing the Ely allele underlying QTL-2<sup>18,500</sup> in the Col background, as well as  
396 Col<sup>Col</sup> and Ely<sup>Col</sup>, in four different environmental conditions. As the Ely *cpFtsY* allele showed a higher NPQ  
397 response especially in high and fluctuating light conditions, but not during low light conditions, we grew  
398 these lines in stable low light conditions, sinusoidal fluctuating light conditions, highly fluctuating light  
399 conditions and in a semi-protected tunnel in the spring of 2021 (Figure 9C). We observed that indeed NPQ  
400 (measured as NPQ<sub>t</sub>) was higher in the NILs compared to the Col<sup>Col</sup> control (Figure 9D). This measure of  
401 NPQ is expressed as the ratio of NPQ after a short high light exposure (two minute high light pulse of  $1000$   
402  $\mu\text{mol m}^{-2} \text{s}^{-1}$ ), in comparison to the low light conditions before high light intensity. The higher NPQ effect is  
403 observed in all treatments, and thus seems to be independent of the growing conditions (Figure 9D).  
404 Likewise, the above ground biomass of the NILs is less than in the Col control (Figure 9E). Thus, the Ely  
405 *cpFtsY* allele results in lower biomass, in all tested conditions, in comparison to the Col allele.

406 A Ser-264-Gly amino acid substitution in the Ely *PsbA* allele does not only confer resistance to triazine  
407 herbicides, it also reduces the affinity of the  $Q_B$  site for plastoquinone (Oettmeier, 1999). We already  
408 observed that the Ely *PsbA* allele results in reduced  $\Phi_{\text{PSII}}$  (Figure 1B). Therefore, higher engagement of  
409 NPQ when  $\Phi_{\text{PSII}}$  is less efficient may be considered as a compensation mechanism in the Ely wild type  
410 accession, with the *PsbA* mutation. Whether this is a requirement for the Ely accession to survive in its  
411 natural habitat is difficult to assess. (Flood *et al.*, 2016a) found the *PsbA* mutation to be wide spread along  
412 the British railway system. However, the nucleotypes of all accessions found to have the *PsbA* mutation  
413 were nearly identical to Ely, making it difficult to draw conclusions on. Meanwhile, we managed to find one  
414 accession, originating from Huntly railway station (Huntly, Scotland, UK; Hun-0), which carries the same  
415 *PsbA* mutation as found in Ely, but in an unrelated nucleotype background. Like Ely, this is a largely  
416 homozygous accession, likely resulting from multi-generation inbreeding. This makes it very likely that  
417 Hun-0 carries a *PsbA* mutation that arose independently from the *PsbA* mutation first identified in Ely.  
418 Comparing the Hun<sup>Col</sup> cybrid with the Col<sup>Col</sup> and Ely<sup>Col</sup> cybrids, shows that the Hun-0 nucleotype does not



419 confer the same compensatory mechanism as conferred by the Ely nucleotide (Figure 9F). This suggests  
 420 that for plants to survive on the railways, the Ely nucleotide compensatory mechanism is not required  
 421 when a *PsbA* mutation is present.

422 The causal gene underlying QTL-4<sup>0.25</sup> for now remains unknown. Nevertheless, the Ely allele for QTL-4<sup>0.25</sup>  
 423 contributes to a 7.5% larger projected leaf area, as measured repeatedly in different experimental set-ups  
 424 (Figures 9G and 9H). This positive effect on plant leaf area is either contributed to the causal gene  
 425 conferring the difference in NPQ and  $\Phi_{PSII}$ , or to a gene very closely linked to it. This as the late flowering  
 426 induced by the *FRI* locus is known for pleiotropic effects, and larger plant leaf area could well be one of  
 427 such pleiotropic effects. Assessing the link between the causal gene and biomass remains to be done, once  
 428 the causal gene is identified.

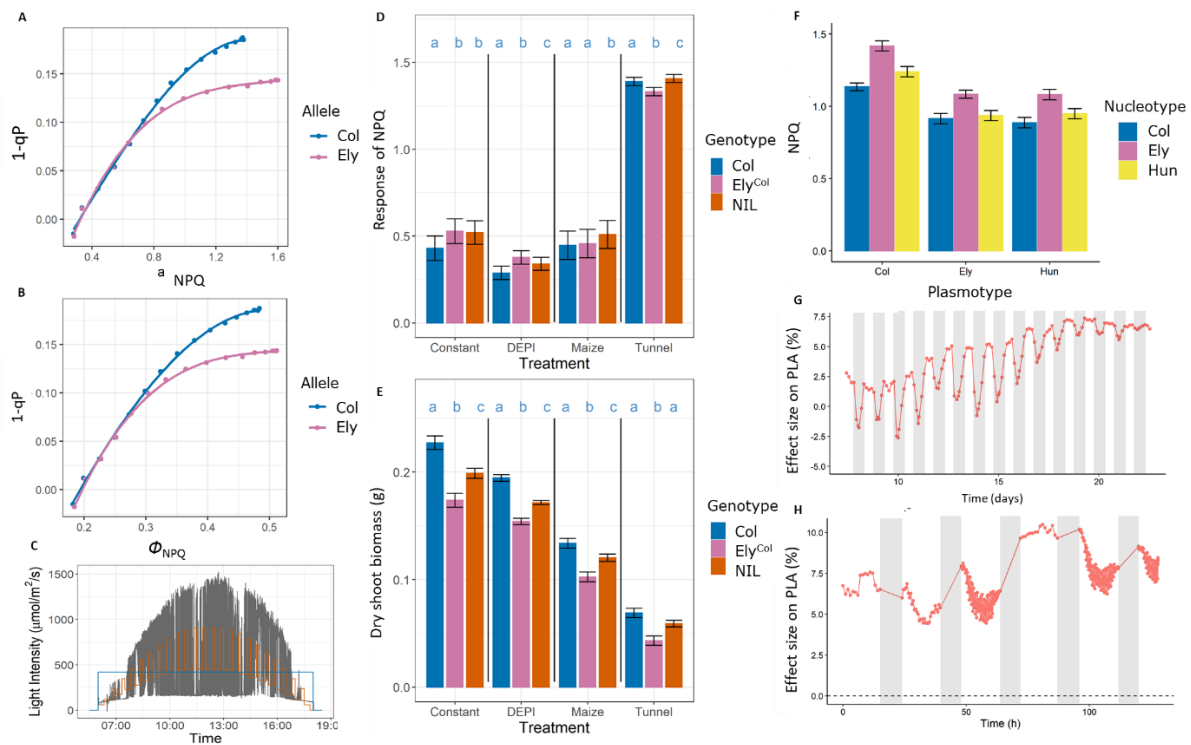

429

430 **Figure 9. Assessment of the physiological impact of the Col and Ely alleles of QTL-2<sup>18,500</sup> and**  
 431 **QTL-4<sup>0.25</sup>.** A) Capacity of NPQ (NPQ) plotted against  $Q_A(1 - q_P)$  during the low light periods in fluctuating  
 432 light conditions for QTL-2<sup>18,500</sup>. The measurements are taken 18 minutes after a high to low-light transition.  
 433 The measurements are taken from the second day with fluctuating light conditions, from 96 to 102 h  
 434 (Figure 4A). B) The same as panel A, but for the flux of NPQ ( $\Phi_{NPQ}$ ) against  $Q_A(1 - q_P)$ . C) The three light  
 435 intensity treatments the genotypes were exposed to on a daily base. In blue the stable light condition is  
 436 shown (named "Constant" in panels D and E), in orange the sinusoidal fluctuating light condition is shown  
 437 (named "DEPI") and in grey the highly fluctuating light condition is shown (named "Maize"). In all three  
 438 conditions the photoperiod and average light intensity is the same. The light intensity for the plants grown  
 439 in the semi-protected tunnel is shown in Supplementary Figure 15 (named "Tunnel" in panels D and E). D)  
 440 The response of NPQ for the Col<sup>Col</sup>, Ely<sup>Col</sup> and NILs possessing QTL-2<sup>18,500</sup> grown in different light regimes,  
 441 as a ratio between NPQ before and after a 2 minute high light pulse of 1000  $\mu\text{mol m}^{-2} \text{s}^{-1}$ . Significance is  
 442 displayed as letters, within one treatment, with a Tukey multiple correction ( $\alpha = 0.05$ ). E) The dry shoot  
 443 biomass (g) for the genotypes as exposed to the four different light treatments 28 days after sowing.

17

444 Significance is displayed as letters, within one treatment, with a Tukey multiple correction ( $\alpha = 0.05$ ). F)  
445 Cybrids with all combinations between the nucleotypes and plasmotypes between Col-0, Ely and Hun-0  
446 measured in the same way as the fluctuating high-throughput phenotyping experiments as used for the  
447 original cybrids, DH mapping and fine mapping experiments. NPQ given at the time point where the NPQ  
448 difference between the Ely and Col nucleotype was largest. G) Plant leaf area measurement for the QTL-  
449  $4^{0.25}$  in the DH population as effect size of the Ely allele in comparison to the Col allele, where a positive  
450 value indicates larger plant leaf area caused by the Ely allele. The plant leaf area was tracked for the full  
451 23 days of the stable light experiment. H) Same as in panel G, but during the fluctuating light experiment,  
452 where  $t=0$  depicts the morning of day 21 of after sowing. The full 21 days the conditions were identical to  
453 plants grown in the stable light experiment as shown in panel G.

## 454 Discussion

### 455 Revealing a nucleotype with faster relaxing NPQ

456 The *A. thaliana* accession Ely is known to have a large effect mutation in the plasmotypic *PsbA* gene (El-  
457 Lithy *et al.*, 2005; Flood & Theeuwens *et al.*, 2020). Here, we discovered that also the nucleotype of Ely  
458 conveys large photosynthetic differences, compared to six other *A. thaliana* accessions. This finding was  
459 possible due to the ability of distinguishing phenotypic differences caused by the plasmotype, from  
460 differences caused by nucleotype (Flood & Theeuwens *et al.*, 2020). During fluctuating light conditions, the  
461 Ely wildtype accession had a roughly equal NPQ phenotype compared to the Col wildtype accession. With  
462 the Ely plasmotype reducing NPQ significantly, this showed that the Ely nucleotype was able to increase  
463 NPQ. Compared to the Col nucleotype, the Ely nucleotype causes lower NPQ when PSII is highly efficient  
464 and higher NPQ when PSII is highly inefficient. (Figure 2). The difference in NPQ between the nucleotypes  
465 was primarily caused by the fast relaxing component,  $q_E$ . Faster relaxing NPQ has been defined as a  
466 desirable photosynthetic property, as it is one of the bottlenecks limiting photosynthesis in crops (Zhu *et al.*,  
467 2004, 2010). NPQ relaxation experiments showed that the Ely nucleotype has ability to relax NPQ  
468 faster than the Col nucleotype (Figure 3). Compared to the Col nucleotype, the Ely nucleotype has higher  
469 NPQ at the switch from high light to low light intensity. However, the Ely nucleotype reduced NPQ faster  
470 than the Col nucleotype, this was apparent within 10 seconds of the light switch and the NPQ remained  
471 lower for up to 150 seconds. When normalized against the starting point, NPQ was found to be significantly  
472 lower during the entire period of low light intensity, showing the relative ability of the Ely nucleotype to  
473 relax NPQ faster. Tobacco and soybean that were genetically modified to have faster NPQ relaxation showed  
474 a similar pattern of relaxation (Kromdijk *et al.*, 2016; De Souza *et al.*, 2022). In these crops, this faster  
475 NPQ relaxation was shown to result in higher yields.

### 476 Plethora of QTLs influencing NPQ in dynamic light conditions

477 Faster NPQ relaxation in tobacco and soybean was achieved by overexpressing the genes encoding *PsbS*,  
478 *VDE* and *ZEP* (Kromdijk *et al.*, 2016; De Souza *et al.*, 2022). Earlier QTL mapping approaches have revealed  
479 genetic variation in *PsbS* to be causal to phenotypic variation in NPQ (as found by Wang *et al.*, 2017b;  
480 Rungrat *et al.*, 2019). However, no genetic differences within the promoter regions or genes encoding  
481 *PsbS*, *VDE* and *ZEP* were found between the Ely and Col nucleotypes. To reveal the underlying genetic  
482 architecture, a doubled haploid population between Ely and Col was constructed. Phenotyping the  
483 segregating population in dynamically controlled high-throughput phenotyping systems revealed variable  
484 broad sense heritability, depending on the light conditions. Variability in heritability is commonly caused  
485 by gene by environment interactions (Visscher *et al.*, 2008). As NPQ is a dynamic process and commonly

486 upregulated in high light and fluctuation light conditions (Long *et al.*, 2022), genetic variation resulting in  
487 differences in NPQ may be most pronounced in such environmental conditions. Mapping the response of  
488 NPQ in the DH population to fluctuating light conditions revealed not just one QTL responsible, but a  
489 plethora of QTLs (Figure 4).

490 The QTL mapping of other photosynthetic traits,  $\Phi_{PSII}$ ,  $\Phi_{NPQ}$ ,  $\Phi_{NO}$ ,  $q_E$  and  $q_I$  identified additional QTLs. Many  
491 of the identified QTLs showed to be highly dependent on specific light conditions. Time of day, adaptation  
492 and duration of a light period all influences whether a QTL affects NPQ. The results also show that several  
493 QTLs can be observed with opposing effects at specific time points for a specific photosynthetic parameter  
494 (Figure 4). Some of the QTLs showed opposing effect depending on the allele. This indicates that both  
495 accessions use different physiological mechanisms to get to roughly the same phenotype. While normally  
496 implicitly assumed that differences in NPQ are primarily caused by expression of PsbS, VDE and ZEP, the  
497 absence of these genes underlying the QTLs detected here, shows that allelic variation in many more genes  
498 can result in photosynthetic variation. Oakley *et al.*, 2018 showed how phenotyping a different biparental  
499 mapping population in *A. thaliana* in cold stressed plants also revealed a range of different QTLs for NPQ.  
500 Therefore, we conclude that genotypes can contain a range of allelic variants that result in different  
501 photosynthetic responses to different and changing environmental conditions, as compared to other  
502 genotypes.

503 In this study a biparental mapping population was chosen to identify the causal genetic variation underlying  
504 differences in NPQ between the two accessions. While depending on the parental lines, the many QTLs  
505 identified here and by Oakley *et al.*, 2018 show that biparental mapping populations have strong statistical  
506 power to reveal many QTLs. To determine whether all QTLs for NPQ present within the population were  
507 identified would require calculating percentage variance explained by the detected QTLs (Kruijer *et al.*,  
508 2015), but because of the many QTLs involved, more accurate methods for these calculations need to be  
509 explored (Kruijer, personal communication). GWAS are often used as an alternative to biparental mapping  
510 populations to reveal genetic variation for photosynthesis (Bezouw *et al.*, 2019). GWAS have as advantage  
511 that the population contains more genetic diversity and lower linkage disequilibrium (Korte and Farlow,  
512 2013). However, GWAS for photosynthetic phenotypes generally identified less QTLs (Chao *et al.*, 2014;  
513 Ortiz *et al.*, 2017; Wang *et al.*, 2017; Van Rooijen *et al.*, 2017; Rungrat *et al.*, 2019; Prinzenberg *et al.*,  
514 2020; Joynson *et al.*, 2021; Ferguson *et al.*, 2021). This is likely the result of lower statistical power caused  
515 by rare alleles with small effect sizes (Korte and Farlow, 2013; Forsberg *et al.*, 2015; Bazakos *et al.*, 2017).  
516 The biparental mapping population used here shows that there are many QTLs with small effect sizes. As  
517 genetic variation for photosynthesis can occur in thousands of genes, all with relatively small effect sizes  
518 (Theeuwens *et al.*, 2022b), mapping populations have more power to detect these. Therefore, to reveal  
519 small effect size genetic variation to improve photosynthesis in crops, biparental populations or  
520 multiparental populations, such as MAGIC populations, will be better suited. Genomic selection procedures  
521 can then be used to bring together all of the desirable genetic variants (Furber *et al.*, 2019; Bezouw *et al.*,  
522 2019; Morales *et al.*, 2020; Theeuwens *et al.*, 2022b).

### 523 Identifying the causal alleles and physiological differences

524 QTL mapping of photosynthetic phenotypes can reveal genetic variation that can directly be used in  
525 breeding programs. However, identification of the causal genes underlying a QTL can generate additional  
526 insights on the impact of natural genetic variation on the photosynthetic functioning (Theeuwens *et al.*,  
527 2022b). In both *A. thaliana* and crops species a range of previous studies have revealed QTLs for

528 photosynthesis, but hardly any of these QTLs have been used to identify the underlying causal gene(s)  
529 (Poormohammad Kiani *et al.*, 2008; Jung and Niyogi, 2009; Wang *et al.*, 2017; Oakley *et al.*, 2018a;  
530 Rungrat *et al.*, 2019; Goto *et al.*, 2021). In this study, the QTL contributing the most to the difference  
531 between the Ely and Col nucleotypes in high to low-light transitions is QTL-2<sup>18,500</sup> (Figures 2, 5 and 6). Fine  
532 mapping and quantitative allelic complementation studies revealed allelic variation in *cpFtsY* to be  
533 underlying QTL-2<sup>18,500</sup>. The protein encoded by *cpFtsY* is part of the chloroplast signal recognition pathway.  
534 The chloroplast signal recognition pathway regulates the posttranslational guidance of light-harvesting  
535 chlorophyll binding proteins (LHCPs) to incorporated them into the thylakoid membrane (Tzvetkova-  
536 Chevolleau *et al.*, 2007). In this pathway the cpFtsY is the receptor protein that aids the LHCPs to be  
537 incorporated into the thylakoid membrane (Tzvetkova-Chevolleau *et al.*, 2007).

538 To understand how the Ely allele of *cpFtsY* causes the differences observed in NPQ compared to the Col  
539 allele, we further discuss the physiological effects of the Ely allele. The *PsbA* gene in the Ely wild type  
540 accessions causes a reduction in NPQ, primarily caused by an increase of the basal dissipation mechanism  
541  $\Phi_{NO}$ . This suggests passive dissipation of heat as a result of the reduced ability to accept electrons by the  
542 *PsbA* encoded protein D1. Knock-out mutants of *cpFtsY* show an impaired D1 protein repair cycle, which  
543 results in reduced photosynthetic capacity (Walter *et al.*, 2015). In this study we show that the Ely allele  
544 of *cpFtsY* conveys higher NPQ when  $\Phi_{PSII}$  is lower. This higher NPQ is caused by a higher flux of NPQ ( $\Phi_{NPQ}$ ),  
545 rather than the flux of the basal dissipation mechanism  $\Phi_{NO}$ . This implies that the difference in NPQ caused  
546 by the Ely allele of *cpFtsY* is caused by an active NPQ mechanism. As a reduced PSII repair cycle via a  
547 knock-out of *cpFtsY* is not expected to cause an upregulation of an active NPQ mechanism, the Ely *cpFtsY*  
548 allele likely has an altered functionality, potentially facilitating the formation of more quenching sites. The  
549 absence of an expression difference between the Col and Ely alleles of *cpFtsY*, but the presence of a Pro-  
550 27-Ser amino acid change in the Ely allele can explain such difference. Further studies should reveal how  
551 the Ely allele of *cpFtsY* results in increased  $\Phi_{NPQ}$ .

552 It remains to be tested whether the Ely allele of *cpFtsY* causes the faster NPQ relaxation observed between  
553 the Col and Ely nucleotype when the PSII efficiency is reduced. Faster initiation and relaxation of NPQ is  
554 considered a desirable trait, as NPQ prevents harmful damage to the reaction centra (Rutherford *et al.*,  
555 2012). At a given  $\Phi_{PSII}$  the Ely allele of *cpFtsY* causes increased NPQ, and when NPQ is increased  $1 - q_P$  is  
556 substantially reduced (Figures 5D and 9A). The lower  $1 - q_P$  indicated that the QA pool is more oxidized,  
557 which suggests that there is less chlorophyll triplets being formed and less damage to the reaction centra  
558 (Murata *et al.*, 2007). Overall this means that the *cpFtsY* allele of Ely results in less photodamage, when  
559 PSII is less efficient. Having more oxidized QA also suggests the Ely allele of *cpFtsY* enables more quenching  
560 complexes (i.e. more NPQ). To test what the impact of having more efficient NPQ is on overall plant  
561 performance, we grew NILs with the Ely *cpFtsY* allele and the Col control with different light conditions,  
562 ranging from low stable light to highly fluctuating light and in a semi-protected gauze tunnel. In all  
563 conditions the biomass was reduced as a result of the Ely introgression in Col around QTL-2<sup>18,500</sup> (Figure  
564 8). The reduction is probably caused by the Ely *cpFtsY* allele dissipating too much energy. Where the Ely  
565 nucleotype showed less NPQ at higher  $\Phi_{PSII}$  values (Figure 2D), the Ely *cpFtsY* allele shows no difference  
566 of NPQ at higher  $\Phi_{PSII}$  (Figure 5D). From this we conclude, that the Ely *cpFtsY* allele is overprotective, but  
567 there are likely additional QTLs within the DH population that reduce NPQ at high  $\Phi_{PSII}$  values as observed  
568 between the parental nucleotypes.

569 The Ely accession was found along the British railway system as a result of its resistance to triazine  
570 herbicides, commonly sprayed in the period between 1957 and 1992 to keep the British railways free of  
571 weeds (Flood *et al.*, 2016a). The mutation in the *PsbA* gene reduced the binding affinity with triazine in  
572 the D1 protein, but consequently reduced the photosynthetic performance (Holt, 1990). The Ely wild type  
573 might compensate for this by actively over dissipating energy through *cpFtsY* allele. A compensatory  
574 mechanism to the reduced photosynthetic performance caused by a *PsbA* mutation has been describe for  
575 *Phalaris paradoxa* (Schönfeld *et al.*, 1987). Without a compensatory mechanism and in the absence of  
576 triazine being sprayed, since 1992, resistant genotypes in theory should have reduced fitness, in  
577 comparison to susceptible genotypes (Holt, 1990; Warwick, 1991). The wide-spread occurrence of Ely 20  
578 years after spraying stopped, suggests the fecundity of Ely was hardly reduced. Triazine was sprayed only  
579 for a relatively short time, it is therefore unlikely that the compensatory mechanism evolved in Ely, or any  
580 of its ancestors, and spread during this period. Instead, it is likely that the compensatory mechanism of  
581 Ely was already present in the nuclear background in which the *PsbA* mutation occurred. While we find the  
582 Ely *cpFtsY* allele to be overprotecting in relatively relaxed, well fed, conditions might favour a more  
583 protective NPQ mechanism, for example in habitats in low nutrients and with full exposure to sunlight.

584 The environments in which plant species evolved are generally considered dynamic rather than static, and  
585 genetic variation for the capacity to deal with such dynamic environments may exist (Murchie *et al.*, 2018).  
586 Here we showed how high-throughput phenotyping in dynamic light environments revealed many QTLs  
587 responsible for differences in NPQ and related photosynthetic phenotypes. While our population segregated  
588 for only two parental lines, it is not enough to state that finding this many QTLs for photosynthetic  
589 phenotypes is a universal phenomenon, but a related study suggested similar amount of QTLs in cold  
590 stressed plants (Oakley *et al.*, 2018a). Repeating such experiments with multiparental populations,  
591 containing multiple segregating alleles and high statistical power, could show how general these  
592 observations are. This study also shows that identifying the causal genes generates insights in the  
593 physiological processes for which natural genetic variation exists. The study of knock-out alleles has  
594 generated most insights in photosynthetic performance (Levine, 1968; Scheller *et al.*, 2001; Alonso *et al.*,  
595 2003; Rochaix, 2004), however the study of allelic variation may contribute to more physiological insights.  
596 The results here suggest more quenching complexes to be present as caused by a natural allele of *cpFtsY*,  
597 which is a phenomenon so far not attributes to this gene.

## 598 **Material and method**

### 599 Plant material

600 In this project, we used *A. thaliana* accession Col-0 (CS76113) and Ely (CS28631). The cybrids Col<sup>Col</sup>,  
601 Col<sup>Ely</sup>, Ely<sup>Col</sup> and Ely<sup>Ely</sup> were previously produced by (Flood & Theeuwens *et al.*, 2020). Seeds of Hun-0 were  
602 collected at the platform of the train station at Huntly, Scotland (57.444373, -2.775414) in May 2014. As  
603 haploid inducer line we used the original Col-0 *GFP-tailswap* haploid inducer, which expresses a green  
604 fluorescent protein (GFP)-tagged CENTROMERE HISTONE 3 protein in a *cenh3/htr12* mutant background  
605 (Ravi and Chan, 2010). To generate cybrids containing the Hun-0 plasmotype, a Hun-0 haploid inducer  
606 line was generated by crossing the original *GFP-tailswap* haploid inducer as a male to Hun-0 accession.  
607 Diploid F<sub>1</sub> lines were selfed and amongst the F<sub>2</sub> progeny, plants were selected that were homozygous for  
608 the *cenh3/htr12* mutation and carrying the *GFP-tailswap*. These were selected by vapor sterilizing the  
609 seeds, obtained from the F<sub>1</sub>, by exposing the seeds in a closed desiccator jar for 3 hours together with a  
610 beaker with 100 mL of bleach to which 3 ml HCl was added. Seeds were sown on ½ MS agarose plates,  
611 exposed to a minimum of 4 days of 4°C after which the plates were placed for 4 days at 25°C. Seedlings  
612 showing the typical stunted root phenotype, as described by (Wijnker *et al.*, 2014), were sown on 4 x 4 x  
613 4 cm rockwool blocks in climate-controlled chambers set at 12 hours daylight, 200 µmol/m<sup>2</sup>/s light,  
614 20°C/18°C day and night temperature and 70% humidity. Plants showing the typical curled leaves and  
615 reduced fertility were selected as novel *GFP-tailswap* haploid inducers, carrying the Hun-0 plasmotype.  
616 Novel *GFP-tailswap* haploid inducer lines were confirmed by PCR genotyping using a dCAPS assay (Ravi *et al.*  
617 *et al.*, 2014). Consecutively, Col<sup>Hun</sup>, Ely<sup>Hun</sup>, Hun<sup>Hun</sup>, Ely<sup>Hun</sup> and Col<sup>Hun</sup> cybrids were made as described by (Flood  
618 & Theeuwens *et al.*, 2020).

619 The doubled haploid (DH) population was made between Col-0 and Ely. F<sub>1</sub> plants resulting from Col-0 X  
620 Ely were made and genotyped using Kompetitive Allele Specific PCR (KASP). The F<sub>1</sub> was crossed onto the  
621 *GFP-tailswap* carrying the Col plasmotype. The resulting seeds were sown on 4 x 4 x 4 cm rockwool blocks,  
622 having the feed solution (Supplementary Table 2), with on each corner of the block one seedling. At 10  
623 days after sowing (DAS) haploid selection started, were haploids were selected upon their smaller and  
624 narrower leaves, symmetry of rosette and overall smaller size of the plant. These potential haploids were  
625 transplanted into 7 x 7 x 7 cm pots with potting soil. Another round of selection was done at flowering  
626 stage, were haploids showed smaller flowers and a high level of sterility. The haploid lines self-fertilized  
627 producing the doubled haploid lines. The doubled haploid lines are numbered from 1 to 523, and referred  
628 to as DH1 to DH523.

629 For the fine mapping populations and near isogenic line (NIL) construction of QTL-2<sup>18,500</sup> and QTL-4<sup>0.25</sup>,  
630 three independent crossing schemes were followed. To produce a NIL and/or recombinants for  
631 finemapping, for QTL-2<sup>18,500</sup>, DH6 and Col<sup>Col</sup> were reciprocally crossed, and genotyped with KASP markers.  
632 Four F<sub>1</sub>s were selfed to produce 500 F<sub>2</sub> plants, that were genotyped with KASP (see Genotyping fine  
633 mapping and NIL genotypes). Six of these F<sub>2</sub> plants were fully homozygous for Col with a heterozygous  
634 Ely introgression around QTL-2<sup>18,500</sup>. Selfing two F<sub>2</sub> plants resulted in 2497 plants, of which 523 were  
635 homozygous NILs and 57 had a heterozygous recombination within a 250-kbp region around QTL-2<sup>18,500</sup>.  
636 Each of these 57 recombinants was selfed and the homozygous recombinant was selected, and  
637 subsequently used for phenotyping. As QTL-4<sup>0.25</sup> is located close to the *FRIGIDA (FRI)* gene, known to  
638 convey many pleiotropic effects, and possibly the observed  $\Phi_{PSII}$  phenotype, one NIL was made including  
639 the *fri* allele of Col and one including the *FRI* allele of Ely. For the NIL including the *fri* allele of Col, Col<sup>Col</sup>

640 was crossed to DH9, and subsequently propagated by selfing until in the F<sub>4</sub> a NIL was selected. For the  
641 NIL including the *FRI* allele of Ely, Col-0 was crossed to DH466. Then the F<sub>1</sub> was backcrossed to Col-0, for  
642 two generations, and the BC2 was selfed, to obtain 3 independent NILs.

643 For quantitatively testing whether candidate genes are the causal genes for the two QTLs, allelic  
644 complementation tests and different RIL were used. For the RILs, we used the F9 generation of 163 RILs  
645 from Bur-0 X Col-0, 164 RILs from Can-0 x Col-0 and 163 RILs from Shah x Col-0, obtained from the  
646 Versailles Arabidopsis Stock Centre and described by (Simon *et al.*, 2008). For the allelic complementation  
647 experiment, SALK T-DNA insertion lines *cpftsy* (N658281) and *kea2* (N677716) were obtained from the  
648 Nottingham Arabidopsis Stock Centre. These lines were genotyped and confirmed to be homozygous for  
649 the T-DNA insertion. The seeds of Col-FRI and Col-FRI-flc3 were obtain from the Max Planck Institute for  
650 Plant Breeding Research, Cologne.

### 651 Genotyping DH population

652 Genotyping of the DH population was done by extracting DNA via CTAB extraction and consecutively the  
653 Hackflex protocol was used to do the library preparation (Gaio *et al.*, 2022). Samples were pooled, and the  
654 fraction showing reads of roughly 500 bp in size were selected and sequenced for on average 1X whole  
655 genome coverage sequencing with Novogene (UK) Ltd. The SNP and indel calling workflow consists of four  
656 steps: (1) read trimming, (2) read alignment, and (3) variant calling. Step 1: Reads were trimmed using  
657 Cutadapt (Martin, 2011) (version 1.18). This step clipped sequences that matched at least 90% of the total  
658 length of one of the adapter sequences provided in the NEBNext Multiplex Oligos for Illumina (Index Primers  
659 Set 1). In addition, it trimmed bases from the 5' and 3' ends of reads if they had a phred score of 20 or  
660 lower. Reads shorter than 70 bp after trimming were discarded. Step 2: Trimmed reads were aligned to a  
661 modified version of the *A. thaliana* Col-0 reference genome (TAIR10, European Nucleotide Accession  
662 number: GCA\_000001735.2) which contained an improved assembly of the mitochondrial sequence  
663 (Sequence Read Archive accession number: BK010421) (Sloan *et al.*, 2018) using bwa mem (version  
664 0.7.10-r789) (Li, 2013) with default parameters. The resulting alignment files were sorted and indexed  
665 using samtools (version 1.3.1) (Li *et al.*, 2009). Alignment files of libraries generated from the same  
666 accession were merged using Picard MarkDuplicates (<https://broadinstitute.github.io/picard/>), called  
667 through the GATK suite (version 4.0.2.1) (McKenna *et al.*, 2010). Picard MarkDuplicates was also used to  
668 mark duplicate read pairs, using an optical duplicate pixel distance of 2500, which is appropriate when  
669 working with patterned Illumina flowcells. Step 3: SNPs and indels were called by running FreeBayes  
670 (Garrison and Marth, 2012) (version 1.3.1-dirty) with alignment files of all samples as input, using default  
671 parameters.

672 After the filtering steps, the read coverage came to an average of 1.2X per DH genotype with a relatively  
673 narrow distribution around the mean (Supplementary Figure 4A). With the low coverage variant calling  
674 data per DH genotype, individual variants could not reliably be used as genotyping markers. Instead a  
675 custom pipeline was built to call genotypes on the basis of different sizes of windows. Several filtering  
676 steps were used to remove very low quality variants, that represent potential false positive calls, and  
677 optimize the window genotype calling. Firstly only the two best, i.e. most common, alleles were considered  
678 for each given variant, as only two alleles should segregate in a biparental population. Variants with read  
679 coverage across all samples (DP) below 50 and above 750 were excluded, also variants with a quality  
680 (QUAL) lower than 10 were removed and quality, and normalized for the number of observed alternative  
681 allele (QUAL/AO), lower than 10 were removed. We determined the reference and alternative allele count

682 to calculate the minor allele count and minor allele frequency, and excluding missing calls for a genotype.  
683 Next variants that are deviant of the expected segregation, but allowing variants showing segregation  
684 distortions, were excluded. For this we used a custom R script that calculated for every variant the average  
685 minor allele count of the 100-kbp region around the given variant, and used a binomial distribution to  
686 determine whether it falls within the 95% confidence interval. If the minor allele count of the variant is  
687 outside the 95% confidence interval of the 100-kbp region around it, that variant is excluded from the  
688 analysis. As a last step for the window sizes of 10, 25, 50, 100 and 250 kbp the genotype was determined  
689 using a custom R script. A window was genotyped as the reference allele if more than 50% of the variants  
690 was called as reference, and likewise the window was genotyped as alternative allele if more than 50%  
691 was called as alternative. Windows with no variants or less than 5% of the average number of variant for  
692 a given DH genotype, were left undetermined (NA). The resulting genotype files were used in all  
693 downstream analyses.

694 Downstream filtering of DH genotypes and markers was done by custom R scripts. DH genotypes were  
695 removed with not enough variants leaving 485 DH genotypes and the parental genotypes. Next, DH  
696 genotypes representing extremely high cross overs numbers, an indication of DNA contamination or  
697 outcrossing, were excluded. The genotyping data with the 250-kbp window size was generated based on  
698 the most variants and thus most accurate genotype call, without getting too big to miss large numbers of  
699 crossovers. This resulted in on average 8.2 cross overs per DH genotype, with 13 DH genotypes showing  
700 more than 25 cross overs, in patterns representative of DNA contamination or outcrossing. Removing these  
701 13 DH genotypes left 472 DH genotypes. Next, markers were excluded with too high cross over rates over  
702 the entire DH population, representative of windows with difficult-to-call genotypes. Windows with more  
703 than 40 apparent cross-overs within the whole population, all showing no linkage disequilibrium with  
704 adjacent windows, were excluded for downstream analyses, which reduced the number of markers from  
705 461 to 456. These 456 markers represent the 250-Kbp windows. In the resulting population, the average  
706 cross over per DH genotype per chromosome is 1.29 (Supplementary Figure 4B). Across the genome,  
707 relatively many cross overs were observed on the top of chromosomes 1, 4 and 5 (Supplementary Figure  
708 4C), a finding in line with increased cross over ratio on the ends of chromosomes primarily observed on  
709 the male side of meiosis (Giraut *et al.*, 2011).

710 Furthermore, duplicate DH genotypes, either due to sampling mistakes, DNA contaminants or seed  
711 contaminants, were excluded. Resulting in 449 DH genotypes and the two parental genotypes. Using the  
712 250-kbp window genotype dataset, the genetic map was constructed to account for potentially larger  
713 structural variation and used for later QTL mapping approaches. For this, the Rqt12 package was used  
714 (Broman *et al.*, 2003)(version 1.47-9). Default filtering steps were performed. Then the genetic map was  
715 constructed using the Kosambi mapping function, and the marker order as given by the physical position  
716 (Supplementary Figure 4A). The genetic map size per chromosome ranged between 121.8 cM for  
717 chromosome 1 and 75.4 cM for chromosome 4 in line with the most up to date genetic map of *A. thaliana*  
718 (Meinke *et al.*, 2009). Segregation distortion was analyzed and found to show a distortion on chromosome  
719 2, physical mapping position 16.250 Mbp. Segregation distortions are not uncommon in *A. thaliana*  
720 mapping populations (Salomé *et al.*, 2011), and could be a sign of seed dormancy or lethal epistatic  
721 interactions. In this population there might be a bias introduced as a result of haploid selection, as this  
722 was done on the typical narrow leaves of a haploid, but this trait could also have segregated in this  
723 population. Despite the segregation distortion, the DH population is large enough to allow for QTL mapping,  
724 even in the region showing segregation distortion.



## 725 Genotyping fine mapping and NIL genotypes

726 For all genotyping steps in this project, DNA extraction was done in 96 deep well plates. Single leaves were  
727 harvested from individual plants and placed in the deep well plates, snap frozen in liquid nitrogen and  
728 ground with a Retsch MM300 TissueLyser. 100 mL extraction buffer (200 mM Tris-HCl, 25 mM EDTA and  
729 1% SDS) was prepared by adding 40 µL of 20 mg/mL RNase A. 500 µL of extraction buffer including RNase  
730 A was added to each well, and incubated at 37 °C for 1 hour, and inverted every 15 minutes. To pellet the  
731 debris the plates were centrifuged for 5 minutes at 3000 x g. In a new deep well plate 130 µL Kac buffer  
732 (98.14 g KAc and 3.5 mL Tween were added to 160 mL H<sub>2</sub>O and H<sub>2</sub>O was added to reach 200 mL) and 400  
733 µL lysate were added. The plates were sealed and inverted for 2 minutes, and incubated on ice for 10  
734 minutes. To pellet the debris the plates were centrifuged for 5 minutes at 3000 x g, and 400 µL of  
735 supernatant was transferred to a new plate containing 440 µL Sera-Mag Speedbeads (Cytiva Europe)  
736 diluted in PEG buffer. Plates were sealed and placed on a shaking table for 30 minutes. Next, the plates  
737 were placed for 5 minutes on a magnet and the supernatant was removed and washed with 500 µL 80%  
738 EtOH, and repeated three times. The plates were left to evaporate in the fume hood for 1 hour and the  
739 DNA was resuspended in 50 µL milliQ.

740 Genotyping of the fine mapping populations and NILs was done with a PCR-based Kompetitive Allele  
741 Specific PCR (KASP) (He *et al.*, 2014) assay. This assay discriminated for polymorphisms between Col-0  
742 and Ely at different positions. Primers were ordered from Biolegio BV and using a working solution of 10  
743 µM the two forward primers and one reverse primer were mixed in a 1:1:2 ratio respectively. The PCR  
744 reaction contained 4 µL KASP Master Mix (LGC Group), 0.14 µL primer mix, 5 µL milliQ and 1 µL DNA. The  
745 PCR cycle started with 15 minute activation at 94 °C, followed by 10 cycles of 20 seconds at 94 °C  
746 denaturation and 1 minute annealing step at 64 °C (and dropping 0.6 °C per cycle), followed by 26 cycles  
747 of 20 seconds denaturation at 94 °C and 1 minute annealing at 55 °C. HEX and FAM fluorescence readings  
748 were taken at the end using a Bio-Rad CFX96 thermocycler. All primers that worked and have been used  
749 in this project are listed in Supplementary Data 2.

## 750 De novo sequencing

751 As input material for the *de novo* assembly of Ely wildtype, 500 mg young leaf material was used. High-  
752 quality high molecular weight (HMW) DNA was extracted following the LeafGo protocol (Driguez *et al.*,  
753 2021). Using 100 ng/µL HMW DNA (Qubit dsDNA Quantitation BR Kit) short reads were eliminated with  
754 the PacBio SRE Circulomics Kit. 1 µg HMW DNA (Qubit dsDNA Quantitation BR Kit) was used to do end-  
755 prepping and nick repairing, using the NEBNext Companion Module Kit (#E7180S) followed by ligation  
756 using the Oxford Nanopore Technologies (ONT) Ligation Sequencing Kit (SQK-LSK109). Roughly 25X  
757 coverage, after base calling, was generated using an ONT Flow Cell (R9.4.1) on the MinION Mk1C. Base  
758 calling was done using the "fast basecalling" option on the MinION Mk1C. De novo assembly was created  
759 using the Flye assembler, with default settings for raw ONT reads (Kolmogorov *et al.*, 2019). The contigs  
760 were polished in 4 subsequent rounds, using Pilon in default settings (Walker *et al.*, 2014), with the short  
761 read Illumina data generated for Ely wildtype in (Flood & Theeuwens *et al.*, 2020).

## 762 Phenotyping and statistical analysis

### 763 **Cybrids in the Dynamic Environment Phenotyping Instrument**

764 The data for this analysis was obtained from Flood & Theeuwens *et al.*, 2020. For this analysis we took the  
765 data from the experiment that took three days, with light conditions as shown in Figure 1A. For the analysis

766 of differences between the Ely and Col plasmotype, only the cybrids with these two plasmotypes were  
767 included. The analysis of differences between the Ely and Col nucleotype was done with the cybrids that  
768 had these two nucleotypes. As the plants were grown randomized over the growing chamber, without  
769 blocking, the statistical analysis was done with a linear mixed model with equation:

$$770 \quad \underline{Y} = \text{Nucleotype} + \text{Plasmotype} + \underline{\varepsilon}$$

771 Using this equation the Best Linear Unbiased Estimates (BLUEs) were extracted over all nucleotypes, in  
772 the case of the Col versus Ely plasmotype analysis. In the case of the nucleotypes analysis, the BLUEs  
773 were extracted over all the plasmotypes. A pairwise t-test was performed using  $\alpha = 0.05$  with  $n=4$ .

#### 774 **NPQ relaxation experiment**

775 This experiment consisted out of two separate experiments, one phenotyping the NPQ relaxation in  
776 darkness and one with a light intensity of  $50 \mu\text{mol m}^{-2} \text{s}^{-1}$ . For both experiments cybrids Col<sup>Col</sup> and Ely<sup>Col</sup>  
777 were grown. The seeds were sown in Petri dishes on soaked filter paper with 1 mL. Then the seeds were  
778 placed in a dark cold room (4 °C) to induce vernalization. After one week these seeds were placed in a  
779 climate-controlled chamber (24 °C with a rhythm of 16/8 h day/night) for 24 h to induce germination. The  
780 germinates seeds were sown on pre-soaked rockwool supplied by Grodan B.V. (Roermond, the  
781 Netherlands) in a climate-controlled chamber. Plants were irrigated with feed solution every three days  
782 (Supplementary Table 2). The chamber had a photoperiod of 16 h with  $200 \mu\text{mol m}^{-2} \text{s}^{-1}$  irradiance, the  
783 temperature was 20 °C during the day and 18 °C during the night, the relative humidity was 70%. The  
784 plants were sown in a complete randomized block design, with  $n=10$  per block.

785 After 14 days of growth, plants were phenotyped in the PlantScreen™ system provided by Photon Systems  
786 Instruments spol. s r.o (Drásov, Czech Republic). One block of two times 10 Col<sup>Col</sup> and Ely<sup>Col</sup> were measured  
787 at once. All plants were dark adapted for 30 minutes, to retrieve  $F_0$  and  $F_m$ . Next plants were exposed to  
788 a sequence of 1000, 100, 1000, 100 and  $1000 \mu\text{mol m}^{-2} \text{s}^{-1}$  with three minutes each. At the end of the last  
789  $1000 \mu\text{mol m}^{-2} \text{s}^{-1}$   $F_m'$  was calculated. Right afterwards the lights were either turned off or set to  $50 \mu\text{mol}$   
790  $\text{m}^{-2} \text{s}^{-1}$ , depending on the experiment. To avoid the influence of saturating light pulses on NPQ relaxation  
791 too much, saturating light pulses was applied to measure  $F_m'$ , with 30 s in between for a period of 300 s.  
792 Both experiments were repeated six times, and in every repetition the first measurement after the 1000  
793  $\mu\text{mol m}^{-2} \text{s}^{-1}$  was delayed by 5 s. This resulted in NPQ relaxation data every 5 s, for both cybrids, during  
794 the entire 300 s. Next, all timepoints were separately analysed using a linear model with the following  
795 model:

$$796 \quad \underline{Y} = \text{Genotype} + \underline{\varepsilon}$$

797 Significant differences were calculated with a threshold in the post hoc tests of  $\alpha = 0.05$ , using the following  
798 equation.

#### 799 **Phenotyping DH population and fine mapping lines.**

800 The DH population was grown in two separate high-throughput phenotyping systems. The first system we  
801 used was the Dynamic Environmental Photosynthetic Imaging (DEPI) (Cruz *et al.*, 2016), with modifications  
802 as described in Tietz *et al.*, 2017. The plants were grown for 18 days in a climate-controlled chamber with  
803 a light intensity of  $200 \mu\text{mol m}^{-2} \text{s}^{-1}$  with a photoperiod of 16 h. After 18 days these plants were moved to  
804 the DEPI system and acclimated for three days. At day 21 the experiment was initiated with light conditions

805 as shown in Figure 4A. The phenotyping of all DH lines was separated over eight experiments with 224  
806 plants in each, with  $n=3$  or 4. Each experiment had a minimum of 14 Col<sup>Col</sup> and Ely<sup>Col</sup> included. Throughout  
807 the experiment growth measurements and chlorophyll fluorescence parameters ( $F_v/F_m$ , NPQ, NPQ<sub>(t)</sub>,  $\Phi_{PSII}$ ,  
808  $\Phi_{NPQ}$ ,  $\Phi_{NO}$ ,  $q_E$ ,  $q_{E(t)}$ ,  $q_I$ ,  $q_{I(t)}$ ,  $q_L$ ) were taken. The broad sense heritability was calculated using the following  
809 equation:

$$810 \quad \underline{Y} = \underline{Genotype} + (\underline{Experiment * Block}) + \underline{\varepsilon}$$

811 The BLUEs were calculated using a linear mixed model:

812

$$813 \quad \underline{Y} = \underline{Genotype} + (\underline{Experiment * Block}) + \underline{\varepsilon}$$

814 The QTL mapping was done using the MQM method in R/qtl (Broman *et al.*, 2003; Arends *et al.*, 2014).  
815 For this the genetic map was used with markers every 250-Kbp region. A pseudo marker was introduced  
816 every 3<sup>th</sup> marker. As cross type we used selfed RIL, as DH is not supported in MQM. The positive and  
817 negative LOD scores were calculated using the effect size of the Col versus the Ely allele. The Bonferroni  
818 threshold was calculated, by correcting for the number of markers and phenotypes. In the analysis we  
819 found 69 of the 449 DH lines to possess the Cvi plasmotype instead of the Col plasmotype. Whilst conferring  
820 a phenotype effect, the analysis with and without these DH lines resulted in the same QTLs (Supplementary  
821 Figure 7). The fine mapping population was phenotyped and analysed in exactly the same way as the DH  
822 population.

823 The second high-throughput phenotyping system used to phenotype the DH population was the Phenovator  
824 system (Flood *et al.*, 2016b). The DH population was germinated as described in the NPQ relaxation  
825 experiment. The plants were sown in a climate-controlled chambers, on rockwool blocks of 4x4x4 cm. They  
826 were irrigated once a week with a feed solution (Supplementary Table 3). The photoperiod was 10 h, 20/18  
827 °C day/night, 70 % relative humidity and light intensity as shown in Supplementary Figure 10. The DH  
828 population was grown at once in the system with a complete randomized block design ( $n = 3$ ). Per day  
829 during the photoperiod six measurements of  $\Phi_{PSII}$  were taken, and nine measurements of projected leaf  
830 area. Outliers were removed when either not germinated or badly established, using a R script to remove  
831 plants 1 standard deviations smaller than the average per genotype per treatment, on the basis of plant  
832 leaf area as measured during the morning of day 18 after sowing. The broad sense heritability was  
833 calculated using the following equation:

$$834 \quad \underline{Y} = \underline{Genotype} + \underline{Block} + \underline{X} + \underline{Y} + \underline{Image\ position} + \underline{\varepsilon}$$

835 The BLUEs were calculated using a linear mixed model:

836

$$837 \quad \underline{Y} = \underline{Genotype} + \underline{Block} + \underline{X} + \underline{Y} + \underline{Image\ position} + \underline{\varepsilon}$$

838 The fine mapping QTL-2<sup>18,500</sup> of was done in exactly the same way as described for the analysis of the DEPI  
839 data. Phenotyping of the NILs was done in a separate experiment, with the same conditions as described  
840 above.

841 The three RIL populations were grown in three separate experiments in the Phenovator system. Plant were  
842 germinated as described for the Phenovator experiment performed with the DH population. Plants were  
843 grown in a climate-controlled chamber with a photoperiod of 14 h, 20/18 °C day/night, 70 % relative  
844 humidity and 200  $\mu\text{mol m}^{-2} \text{s}^{-1}$ .  $\Phi_{\text{PSII}}$  was measured three times a day. The genotypes were sown in a  
845 complete randomized block design, with  $n = 8$ . All measurements were analysed using a linear mixed  
846 model approach, using the restricted maximum likelihood procedure with the lme4 package (version 1.1-  
847 30). BLUEs were calculated with the following statistical model:

$$848 \quad \underline{Y} = \text{Genotype} + \underline{\text{Block}} + \underline{X} + \underline{Y} + \underline{\text{Image position}} + \underline{\varepsilon}$$

849 Subsequent QTL mapping was done with the MQM method as described for the DH population analysis.

### 850 **Biomass experiments in different light regimes**

851 For the biomass experiment cybrids Col<sup>Col</sup> and Ely<sup>Col</sup> and three independent NILs surrounding QTL-2<sup>18,500</sup>  
852 were used. Plants were germinated as described for the NPQ relaxation experiment, and grown with a  
853 photoperiod of 12 hours. During the photoperiod the temperature was 20 °C and during the night 18 °C,  
854 and relative humidity was kept at 70%. Plants were grown on rockwool blocks and irrigated with feed  
855 solution (Supplementary Table 2) once a week. During the entire growth period the plants were grown in  
856 one climate-controlled chamber. Within the chamber three separate compartments were created, and in  
857 each compartment a different light regime was applied. The LED light systems and the controls via a ESP32  
858 are described in (Theeuwens *et al.*, 2022a). The three light treatments were: (1) stable light conditions with  
859 an intensity of 415  $\mu\text{mol m}^{-2} \text{s}^{-1}$ , (2) a sinusoidal fluctuating light regime inspired by the third day of the  
860 DEPI experiment as shown in Figure 1A and (3) a highly fluctuating light condition. The fluctuating light  
861 condition is based on measurements within a maize canopy as described in (Theeuwens *et al.*, 2022a).  
862 Plants were grown in a complete randomized block design, with 12 blocks of 20 plants in each treatment  
863 ( $n = 48$ ). The fourth treatments was grown separately in a semi-protected gauze tunnel in spring 2021.  
864 The materials and methods used for this experiment are similar to the spring experiment in 2021 as  
865 conducted for the cybrid panel as described in (Theeuwens *et al.*, 2022a). The conditions as measured at  
866 plant level as shown in Supplementary Figure 15. The plants were sown in a complete randomized block  
867 design, with  $n = 40$ .

868 Plants from all four treatments were phenotyped for chlorophyll fluorescence parameters with the  
869 PlantScreen™ system, using a 6 minute fluctuating light regime, yielding 37 chlorophyll fluorescence and  
870 20 morphological parameters (Theeuwens *et al.*, 2022a). The phenotyping was done 20 days after sowing  
871 for the plants in the climate-controlled chamber and 40 days after sowing for the semi-protected  
872 experiment. Shoot dry weight measurements for the plants in the climate-controlled chamber were taken  
873 27 days after sowing, and 41 days after sowing for the plants in the semi-protected experiment.

874 Outliers were removed when either not germinated or badly established, using a R script to remove plants  
875 1.5 standard deviations smaller than the average per genotype per treatment, on the basis of plant leaf  
876 area. Next all parameters were analysed using a linear mixed model approach, using the restricted  
877 maximum likelihood procedure with the lme4 package (version 1.1-30). Using analysis of variance with  
878 the Kenward-Roger approximation for degrees of freedom, significant differences were calculated with a  
879 threshold in the post hoc tests of  $\alpha = 0.05$  with Tukey correction. This revealed no differences between the

880 three independently obtained NILs, and thus were grouped together. The analysis was done on each  
881 treatment separately, using the following equation:

$$882 \quad \underline{Y} = \textit{Genotype} + \underline{\textit{Block}} + \underline{\textit{Basin}} + \underline{\varepsilon}$$

883

## 884 **Data availability**

885 The raw data files with genotyping and phenotyping data will be available via Zenodo.

## 886 **Code availability**

887 The scripts for the genotyping pipeline, the de novo assembly and QTL mapping will be available from  
888 GitLab (<https://git.wur.nl/tom.theeuwen/ely-npq.git>).

## 889 **Acknowledgements**

890 The seeds of Col-FRI and Col-FRI-flc3 were kindly provided by George Coupland. We would like to thank  
891 Sofie Hofman, Max van der Sandt and Sietze Wals for their help in experimental work. Also we would like  
892 to thank Ben Auxier, Emilie Wientjes, Maarten Koornneef, René Boesten and Roel van Bezouw for  
893 discussions that help shape this work. Maarten Koornneef is also acknowledged for his feedback on the  
894 manuscript.

## 895 **Author contributions**

896 TPJMT, JH, and MGMA conceived and designed the study. TPJMT, LLL, SP, HB, KL, JD, PJF, CH, FFMB, RW  
897 and DH performed and analysed experiments. TPJMT oversaw the whole project and DMK, JH and MGMA  
898 provided steering during the project. TPJMT wrote the manuscript, with feedback from JH and MGMA.

## 899 **Conflict of interest**

900 The authors declare no competing interests.

## 901 **Funding**

902 This work was, in part, supported by the Netherlands Organization for Scientific Research (NWO) through  
903 ALWGS.2016.012 (TPJMT).

904 **References**

- 905 **Alonso JM, Stepanova AN, Leisse TJ, et al.** 2003. Genome-wide insertional mutagenesis of *Arabidopsis*  
906 *thaliana*. *Science* **301**, 653–657.
- 907 **Anderson JM, Chow WS, Park Y-I.** 1995. The grand design of photosynthesis: Acclimation of the  
908 photosynthetic apparatus to environmental cues. *Photosynthesis Research* **46**, 129–139.
- 909 **Arends D, Arends D, Prins P, Broman KW, Jansen RC.** 2014. Tutorial-multiple-QTL mapping (MQM)  
910 analysis Tutorial-Multiple-QTL Mapping (MQM) Analysis for R/qtl.
- 911 **Bazakos C, Hanemian M, Trontin C, Jiménez-Gómez JM, Loudet O.** 2017. New Strategies and Tools  
912 in Quantitative Genetics: How to Go from the Phenotype to the Genotype. *Annual Review of Plant Biology*  
913 **68**, 435–455.
- 914 **Bezouw RFHM van, Keurentjes JJB, Harbinson J, Aarts MGM.** 2019. Converging phenomics and  
915 genomics to study natural variation in plant photosynthetic efficiency. *The Plant Journal* **97**, 112–133.
- 916 **Brachi B, Faure N, Horton M, Flahauw E, Vazquez A, Nordborg M, Bergelson J, Cuguen J, Roux**  
917 **F.** 2010. Linkage and association mapping of *Arabidopsis thaliana* flowering time in nature. *PLoS genetics*  
918 **6**, e1000940.
- 919 **Broman KW, Wu H, Saunak Sen ´, Churchill GA.** 2003. R/qtl: QTL mapping in experimental crosses.  
920 *BIOINFORMATICS APPLICATIONS NOTE* **19**, 889–890.
- 921 **Chao M, Yin Z, Hao D, Zhang J, Song H, Ning A, Xu X, Yu D.** 2014. Variation in Rubisco activase  
922 (RCA $\beta$ ) gene promoters and expression in soybean [*Glycine max* (L.) Merr.]. *Journal of Experimental*  
923 *Botany* **65**, 47–59.
- 924 **Cruz JA, Savage LJ, Zegarac R, Hall CC, Satoh-Cruz M, Davis GA, Kovac WK, Chen J, Kramer DM.**  
925 2016. Dynamic Environmental Photosynthetic Imaging Reveals Emergent Phenotypes. *Cell Systems* **2**,  
926 365–377.
- 927 **De Souza AP, Burgess SJ, Doran L, Hansen J, Manukyan L, Maryn N, Gotarkar D, Leonelli L, Niyogi**  
928 **KK, Long SP.** 2022. Soybean photosynthesis and crop yield are improved by accelerating recovery from  
929 photoprotection. *Science* **377**, 851–854.
- 930 **Durand M, Matule B, Burgess AJ, Robson TM.** 2021. Sunfleck properties from time series of fluctuating  
931 light. *Agricultural and Forest Meteorology* **308–309**, 108554.
- 932 **Durrett TP, Connolly EL, Rogers EE.** 2006. *Arabidopsis* cpFtsY mutants exhibit pleiotropic defects  
933 including an inability to increase iron deficiency-inducible root Fe(III) chelate reductase activity. *Plant*  
934 *Journal* **47**, 467–479.
- 935 **Ei-Lithy ME, Rodrigues GC, van Rensen JJS, Snel JFH, Dassen HJHA, Koornneef M, Jansen MAK,**  
936 **Aarts MGM, Vreugdenhil D.** 2005. Altered photosynthetic performance of a natural *Arabidopsis* accession  
937 is associated with atrazine resistance. *Journal of Experimental Botany* **56**, 1625–1634.
- 938 **Ferguson JN, Fernandes SB, Monier B, et al.** 2021. Machine learning-enabled phenotyping for GWAS  
939 and TWAS of WUE traits in 869 field-grown sorghum accessions. *Plant Physiology* **187**, 1481–1500.
- 940 **Flood & Theeuwes, Schneeberger K, Keizer P, et al.** 2020. Reciprocal cybrids reveal how organellar  
941 genomes affect plant phenotypes. *Nature Plants* **6**, 13–21.
- 942 **Flood PJ, van Heerwaarden J, Becker F, et al.** 2016a. Whole-Genome Hitchhiking on an Organelle  
943 Mutation. *Current Biology* **26**, 1306–1311.
- 944 **Flood PJ, Kruijer W, Schnabel SK, et al.** 2016b. Phenomics for photosynthesis, growth and reflectance  
945 in *Arabidopsis thaliana* reveals circadian and long-term fluctuations in heritability. *Plant Methods* **12**, 14.
- 946 **Forsberg SKG, Andreatta ME, Huang XY, Danku J, Salt DE, Carlborg Ö.** 2015. The Multi-allelic  
947 Genetic Architecture of a Variance-Heterogeneity Locus for Molybdenum Concentration in Leaves Acts as  
948 a Source of Unexplained Additive Genetic Variance. *PLoS Genetics* **11**, e1005648.

- 949 **Fransz P, Linc G, Lee C-R, et al.** 2016. Molecular, genetic and evolutionary analysis of a paracentric  
950 inversion in *Arabidopsis thaliana*. *The Plant Journal* **88**, 159–178.
- 951 **Furbank RT, Jimenez-Berni JA, George-Jaeggli B, Potgieter AB, Deery DM.** 2019. Field crop  
952 phenomics: enabling breeding for radiation use efficiency and biomass in cereal crops. *New Phytologist*  
953 **223**, 1714–1727.
- 954 **Gaio D, Anantanawat K, To J, Liu M, Monahan L, Darling AEY.** 2022. Hackflex: low-cost, high-  
955 throughput, Illumina Nextera Flex library construction. *Microbial Genomics* **8**, 000744.
- 956 **Garcia-Molina A, Leister D.** 2020. Accelerated relaxation of photoprotection impairs biomass  
957 accumulation in *Arabidopsis*. *Nature Plants* **6**, 9–12.
- 958 **Garrison E, Marth G.** 2012. Haplotype-based variant detection from short-read sequencing.
- 959 **Giraut L, Falque M, Drouaud J, Pereira L, Martin OC, Mézard C.** 2011. Genome-Wide Crossover  
960 Distribution in *Arabidopsis thaliana* Meiosis Reveals Sex-Specific Patterns along Chromosomes (M Lichten,  
961 Ed.). *PLoS Genetics* **7**, e1002354.
- 962 **Goto S, Mori H, Uchiyama K, Ishizuka W, Taneda H, Kono M, Kajiya-Kanegae H, Iwata H.** 2021.  
963 Genetic Dissection of Growth and Eco-Physiological Traits Associated with Altitudinal Adaptation in Sakhalin  
964 Fir (*Abies sachalinensis*) Based on QTL Mapping. *Genes* **12**, 1110.
- 965 **He C, Holme J, Anthony J.** 2014. SNP Genotyping: The KASP Assay. In: Fleury D,, In: Whitford R, eds.  
966 *Methods in Molecular Biology. Crop Breeding: Methods and Protocols*. New York, NY: Springer, 75–86.
- 967 **Holt JS.** 1990. Fitness and Ecological Adaptability of Herbicide-Resistant Biotypes. ACS Symposium Series.  
968 *Managing Resistance to Agrochemicals*. American Chemical Society, 419–429.
- 969 **Johnson MP, Davison PA, Ruban AV, Horton P.** 2008. The xanthophyll cycle pool size controls the  
970 kinetics of non-photochemical quenching in *Arabidopsis thaliana*. *FEBS Letters* **582**, 262–266.
- 971 **Joyson R, Molero G, Coombes B, Gardiner LJ, Rivera-Amado C, Piñera-Chávez FJ, Evans JR,  
972 Furbank RT, Reynolds MP, Hall A.** 2021. Uncovering candidate genes involved in photosynthetic capacity  
973 using unexplored genetic variation in Spring Wheat. *Plant Biotechnology Journal* **19**, 1537–1552.
- 974 **Jung HS, Niyogi KK.** 2009. Quantitative Genetic Analysis of Thermal Dissipation in *Arabidopsis*. *Plant*  
975 *Physiology* **150**, 977–986.
- 976 **Kaiser E, Morales A, Harbinson J.** 2018. Fluctuating light takes crop photosynthesis on a rollercoaster  
977 ride. *Plant Physiology* **176**, 977–989.
- 978 **Korte A, Farlow A.** 2013. The advantages and limitations of trait analysis with GWAS: a review. *Plant*  
979 *Methods* 2013 9:1 **9**, 1–9.
- 980 **Kromdijk J, Głowacka K, Leonelli L, Gabilly ST, Iwai M, Niyogi KK, Long SP.** 2016. Improving  
981 photosynthesis and crop productivity by accelerating recovery from photoprotection. *Science* **354**.
- 982 **Kromdijk J, Walter J.** 2022. Relaxing non-photochemical quenching (NPQ) to improve photosynthesis in  
983 crops. *Burleigh Dodds Science Publishing*, .
- 984 **Kruijer W, Boer MP, Malosetti M, Flood PJ, Engel B, Kooke R, Keurentjes JJB, van Eeuwijk FA.**  
985 2015. Marker-Based Estimation of Heritability in Immortal Populations. *Genetics* **199**, 379–398.
- 986 **Lee I, Bleecker A, Amasino R.** 1993. Analysis of naturally occurring late flowering in *Arabidopsis thaliana*.  
987 *Molecular and General Genetics MGG* **237**, 171–176.
- 988 **Lehretz GG, Schneider A, Leister D, Sonnewald U.** 2022. High non-photochemical quenching of VPZ  
989 transgenic potato plants limits CO<sub>2</sub> assimilation under high light conditions and reduces tuber yield under  
990 fluctuating light. *Journal of Integrative Plant Biology*.
- 991 **Levine RP.** 1968. Genetic dissection of photosynthesis. *Science* **162**, 768–771.

- 992 **Li H.** 2013. Aligning sequence reads, clone sequences and assembly contigs with BWA-MEM.
- 993 **Li H, Handsaker B, Wysoker A, Fennell T, Ruan J, Homer N, Marth G, Abecasis G, Durbin R.** 2009.  
994 The Sequence Alignment/Map format and SAMtools. *Bioinformatics* **25**, 2078–2079.
- 995 **Long SP, Taylor SH, Burgess SJ, Carmo-Silva E, Lawson T, Souza APD, Leonelli L, Wang Y.** 2022.  
996 Into the Shadows and Back into Sunlight: Photosynthesis in Fluctuating Light.  
997 <https://doi.org/10.1146/annurev-arplant-070221-024745> **73**, 617–648.
- 998 **Martin M.** 2011. Cutadapt removes adapter sequences from high-throughput sequencing reads.  
999 *EMBnet.journal* **17**, 10–12.
- 1000 **McKenna A, Hanna M, Banks E, et al.** 2010. The genome analysis toolkit: A MapReduce framework for  
1001 analyzing next-generation DNA sequencing data. *Genome Research* **20**, 1297–1303.
- 1002 **Meinke D, Sweeney C, Muralla R.** 2009. Integrating the Genetic and Physical Maps of *Arabidopsis*  
1003 *thaliana*: Identification of Mapped Alleles of Cloned Essential (EMB) Genes. *PLOS ONE* **4**, e7386.
- 1004 **Morales F, Ancín M, Fakhret D, González-Torralba J, Gámez AL, Seminario A, Soba D, Ben Mariem**  
1005 **S, Garriga M, Aranjuelo I.** 2020. Photosynthetic Metabolism under Stressful Growth Conditions as a  
1006 Bases for Crop Breeding and Yield Improvement. *Plants* **9**, 88.
- 1007 **Müller P, Li X-P, Niyogi KK.** 2001. Non-Photochemical Quenching. A Response to Excess Light Energy1.  
1008 *Plant Physiology* **125**, 1558–1566.
- 1009 **Murata N, Takahashi S, Nishiyama Y, Allakhverdiev SI.** 2007. Photoinhibition of photosystem II under  
1010 environmental stress. *Biochimica et Biophysica Acta (BBA) - Bioenergetics* **1767**, 414–421.
- 1011 **Murchie EH, Kefauver S, Araus JL, Muller O, Rascher U, Flood PJ, Lawson T.** 2018. Measuring the  
1012 dynamic photosynthetic. *Annals of Botany* **122**, 207–220.
- 1013 **Oakley CG, Savage L, Lotz S, Larson GR, Thomashow MF, Kramer DM, Schemske DW.** 2018a.  
1014 Genetic basis of photosynthetic responses to cold in two locally adapted populations of *Arabidopsis thaliana*.  
1015 *Journal of Experimental Botany* **69**, 699–709.
- 1016 **Oakley CG, Savage L, Lotz S, Larson GR, Thomashow MF, Kramer DM, Schemske DW.** 2018b.  
1017 Genetic basis of photosynthetic responses to cold in two locally adapted populations of *Arabidopsis thaliana*.  
1018 *Journal of Experimental Botany* **69**, 699–709.
- 1019 **Oettmeier W.** 1999. Herbicide resistance and supersensitivity in photosystem II. *Cellular and Molecular*  
1020 *Life Sciences CMLS* **55**, 1255–1277.
- 1021 **Ort DR, Merchant SS, Alric J, et al.** 2015. Redesigning photosynthesis to sustainably meet global food  
1022 and bioenergy demand. *Proceedings of the National Academy of Sciences of the United States of America*  
1023 **112**, 8529–8536.
- 1024 **Ortiz D, Hu J, Salas Fernandez MG.** 2017. Genetic architecture of photosynthesis in *Sorghum bicolor*  
1025 under non-stress and cold stress conditions. *Journal of Experimental Botany* **68**, 4545–4557.
- 1026 **Poormohammad Kiani S, Maury P, Sarrafi A, Grieu P.** 2008. QTL analysis of chlorophyll fluorescence  
1027 parameters in sunflower (*Helianthus annuus* L.) under well-watered and water-stressed conditions. *Plant*  
1028 *Science* **175**, 565–573.
- 1029 **Prinzenberg AE, Campos-Dominguez L, Kruijer W, Harbinson J, Aarts MGM.** 2020. Natural variation  
1030 of photosynthetic efficiency in *Arabidopsis thaliana* accessions under low temperature conditions. *Plant Cell*  
1031 *and Environment* **43**, 2000–2013.
- 1032 **Ravi M, Chan SWL.** 2010. Haploid plants produced by centromere-mediated genome elimination. *Nature*  
1033 **464**, 615–618.
- 1034 **Ravi M, Marimuthu MPA, Tan EH, et al.** 2014. A haploid genetics toolbox for *Arabidopsis thaliana*.  
1035 *Nature communications* **5**, 5334.



- 1036 **Rochaix J-D.** 2004. Genetics of the Biogenesis and Dynamics of the Photosynthetic Machinery in  
1037 Eukaryotes. *The Plant Cell* **16**, 1650.
- 1038 **Van Rooijen R, Kruijer W, Boesten R, Van Eeuwijk FA, Harbinson J, Aarts MGM.** 2017. Natural  
1039 variation of YELLOW SEEDLING1 affects photosynthetic acclimation of *Arabidopsis thaliana*. *Nature*  
1040 *Communications* **8**, 1–9.
- 1041 **Ruban AV.** 2017. Crops on the fast track for light. *Nature* **541**, 36–37.
- 1042 **Rungrat T, Almonte AA, Cheng R, Gollan PJ, Stuart T, Aro EM, Borevitz JO, Pogson B, Wilson PB.**  
1043 2019. A Genome-Wide Association Study of Non-Photochemical Quenching in response to local seasonal  
1044 climates in *Arabidopsis thaliana*. *Plant Direct* **3**, e00138.
- 1045 **Rutherford AW, Osyczka A, Rappaport F.** 2012. Back-reactions, short-circuits, leaks and other energy  
1046 wasteful reactions in biological electron transfer: redox tuning to survive life in O(2). *FEBS letters* **586**,  
1047 603–616.
- 1048 **Salomé PA, Bomblies K, Fitz J, Laitinen RAE, Warthmann N, Yant L, Weigel D.** 2011. The  
1049 recombination landscape in *Arabidopsis thaliana* F2 populations. *Heredity* 2012 108:4 **108**, 447–455.
- 1050 **Scheller HV, Jensen PE, Haldrup A, Lunde C, Knoetzel J.** 2001. Role of subunits in eukaryotic  
1051 Photosystem I. *Biochimica et Biophysica Acta - Bioenergetics* **1507**, 41–60.
- 1052 **Schönfeld M, Yaacoby T, Michael O, Rubin B.** 1987. Triazine Resistance without Reduced Vigor in  
1053 *Phalaris paradoxa*. *Plant Physiology* **83**, 329–333.
- 1054 **Shindo C, Aranzana MJ, Lister C, Baxter C, Nicholls C, Nordborg M, Dean C.** 2005. Role of FRIGIDA  
1055 and FLOWERING LOCUS C in Determining Variation in Flowering Time of *Arabidopsis*. *Plant Physiology* **138**,  
1056 1163–1173.
- 1057 **Simon M, Loudet O, Durand S, Bérard A, Brunel D, Sennesal FX, Durand-Tardif M, Pelletier G,**  
1058 **Camilleri C.** 2008. Quantitative trait loci mapping in five new large recombinant inbred line populations of  
1059 *Arabidopsis thaliana* genotyped with consensus single-nucleotide polymorphism markers. *Genetics* **178**,  
1060 2253–2264.
- 1061 **Sloan DB, Wu Z, Sharbrough J.** 2018. Correction of Persistent Errors in *Arabidopsis* Reference  
1062 Mitochondrial Genomes. *The Plant cell* **30**, 525–527.
- 1063 **Theeuwens TPJM, Lawson A, Tijink D, et al.** 2022a. The NDH complex reveals a trade-off preventing  
1064 maximizing photosynthesis in *Arabidopsis thaliana*.
- 1065 **Theeuwens TPJM, Logie LL, Harbinson J, Aarts MGM.** 2022b. Genetics as a key to improving crop  
1066 photosynthesis. *Journal Of Experimental Botany*.
- 1067 **Tietz S, Hall CC, Cruz JA, Kramer DM.** 2017. NPQt: a chlorophyll fluorescence parameter for rapid  
1068 estimation and imaging of non-photochemical quenching of excitons in photosystem-II-associated antenna  
1069 complexes. *Plant, Cell & Environment* **40**, 1243–1255.
- 1070 **Tzvetkova-Chevolleau T, Hutin C, Noël LD, et al.** 2007. Canonical Signal Recognition Particle  
1071 Components Can Be Bypassed for Posttranslational Protein Targeting in Chloroplasts. *The Plant Cell* **19**,  
1072 1635–1648.
- 1073 **Visscher PM, Hill WG, Wray NR.** 2008. Heritability in the genomics era — concepts and misconceptions.  
1074 *Nature Reviews Genetics* **9**, 255–266.
- 1075 **Walter B, Pieta T, Schünemann D.** 2015. *Arabidopsis thaliana* mutants lacking cpFtsY or cpSRP54 exhibit  
1076 different defects in photosystem II repair. *Frontiers in Plant Science* **6**.
- 1077 **Wang Q, Zhao H, Jiang J, Xu J, Xie W, Fu X, Liu C, He Y, Wang G.** 2017. Genetic architecture of  
1078 natural variation in rice nonphotochemical quenching capacity revealed by genome-wide association study.  
1079 *Frontiers in Plant Science* **8**, 1773.

- 1080 **Warwick SI.** 1991. Herbicide Resistance in Weedy Plants: Physiology and Population Biology. Annual  
1081 Review of Ecology and Systematics **22**, 95–114.
- 1082 **Wijnker E, Deurhof L, van de Belt J, et al.** 2014. Hybrid recreation by reverse breeding in *Arabidopsis*  
1083 *thaliana*. Nature protocols **9**, 761–72.
- 1084 **Zhu XG, Long SP, Ort DR.** 2010. Improving photosynthetic efficiency for greater yield. Annual Review of  
1085 Plant Biology **61**, 235–261.
- 1086 **Zhu XG, Ort DR, Whitmarsh J, Long SP.** 2004. The slow reversibility of photosystem II thermal energy  
1087 dissipation on transfer from high to low light may cause large losses in carbon gain by crop canopies: A  
1088 theoretical analysis. Journal of Experimental Botany. Oxford Academic, 1167–1175.
- 1089

1090 **Supplementary Tables**

1091 **Supplementary Table 1. Overview of genes and genetic variation between Ely and Col in the QTL-2<sup>18,500</sup>.** For each gene within the QTL the abbreviation,  
 1092 function, position (bp) and whether it is expressed in leaves, is shown. The genetic variant within or upstream of the gene are shown, with the positions, and the  
 1093 reference and alternative alleles. The predicted impact and amino acid change are given in the case of non-synonymous SNPs. The impact of intergenic mutations  
 1094 is difficult to predict, and hence excluded, with the exception of two deletions in the region that could be the promotor.

| Gene      | Name                 | Function                                   | Position (bp)                 | Expressed in leaves | Position (bp)                  | Ref     | Alt            | Type                         | Impact                         | AA change               | AA properties                                    | PROVEAN score   |
|-----------|----------------------|--------------------------------------------|-------------------------------|---------------------|--------------------------------|---------|----------------|------------------------------|--------------------------------|-------------------------|--------------------------------------------------|-----------------|
| At2g45770 | CPFTSY               | LHCP integration into isolated thylakoids  | 18,851,088<br>–<br>18,853,741 | Yes                 | 337 bp upstream of start codon | -       | 37-bp deletion | Promotor deletion            | No gene expression differences | -                       | -                                                | -               |
|           |                      |                                            |                               |                     | 18851326                       | C       | T              | Non-synonymous               | MODERATE                       | Pro → Ser (AA 27)       | Ser: polar (Pro: non-polar and cyclic structure) | 0.146 (Neutral) |
| At2g45780 |                      | Unknown                                    | 18,854,555<br>–<br>18,855,184 | No                  | -                              | -       | -              | -                            | -                              | -                       | -                                                | -               |
| At2g45790 | PHOSPHO-MANNO-MUTASE | Cytoplasmic phosphomannomutase             | 18,855,675<br>–<br>18,858,018 | Yes                 | 201 bp upstream of start codon | -       | 26-bp deletion | Promotor deletion            | No gene expression differences | -                       | -                                                | -               |
| At2g45800 | PLIM2A               | Regulates actin cytoskeleton organization. | 18,857,941<br>–<br>18,859,278 | No                  | -                              | -       | -              | -                            | -                              | -                       | -                                                | -               |
| At2g45810 | RNA HELICASE 6       | DEA(D/H)-box RNA helicase family protein   | 18,859,472<br>–<br>18,862,970 | Yes                 | 18859982                       | ACCTCAG | A              | Disruptive in frame deletion | MODERATE                       | Gln and Pro del (AA 53) |                                                  | -0.36 (Neutral) |

|           |             |                                                  |                         |     |          |   |   |                |          |                    |                                                   |                  |   |
|-----------|-------------|--------------------------------------------------|-------------------------|-----|----------|---|---|----------------|----------|--------------------|---------------------------------------------------|------------------|---|
|           |             |                                                  |                         |     |          |   |   |                |          |                    | and 54)                                           |                  |   |
| At2g45820 | REMORIN 1.3 | Control plasmodesmata aperture and functionality | 18,862,953 – 18,864,741 | Yes | -        | - | - | -              | -        | -                  | -                                                 | -                | - |
| At2g45830 | DTA2        | Downstream target of AGL15 2                     | 18,865,923 – 18,868,542 | No  | 18866715 | T | C | Non-synonymous | MODERATE | Phe → Leu (AA 97)  | Both non-polar                                    | 0.378 (Neutral)  |   |
| At2g45840 | DUF821      | O-glucosyltransferase rumi-like protein          | 18,869,153 – 18,871,786 | No  | 18871417 | G | A | Non-synonymous | MODERATE | Ser → Asn (AA 501) | Both polar                                        | 2.611 (Neutral)  |   |
| At2g45850 | AHL9        | Hook motif DNA-binding family protein            | 18,871,479 – 18,873,972 | Yes | 18873394 | A | G | Non-synonymous | MODERATE | Ser → Pro (AA 22)  | Ser: polar<br>Pro: non-polar and cyclic structure | -0.031 (Neutral) |   |

1095

1096 **Supplementary Table 2.** Nutrient solution as used for growing *A. thaliana* on rockwool substrate.

|                 | Concentration | Unit   |
|-----------------|---------------|--------|
| NH <sub>4</sub> | 1.7           | mmol/L |
| K               | 4.13          | mmol/L |
| Ca              | 1.97          | mmol/L |
| Mg              | 1.24          | mmol/L |
| NO <sub>3</sub> | 4.14          | mmol/L |
| SO <sub>4</sub> | 3.14          | mmol/L |
| P               | 1.29          | mmol/L |
| Fe*             | 21            | µmol/L |
| Mn              | 3.4           | µmol/L |
| Zn              | 4.7           | µmol/L |
| B               | 14            | µmol/L |
| Cu              | 6.9           | µmol/L |
| Mo              | 0.5           | µmol/L |
|                 |               |        |
| EC              | 1.4           | mS/cm  |
| pH**            | 6.1           |        |

\*Consists of 50% Fe-DTPA 3% and 50% Fe- EDDHSA 3%

\*\*pH adjusted with Potassium hydroxide and Sulphuric acid

1097

1098 **Supplementary Figures**

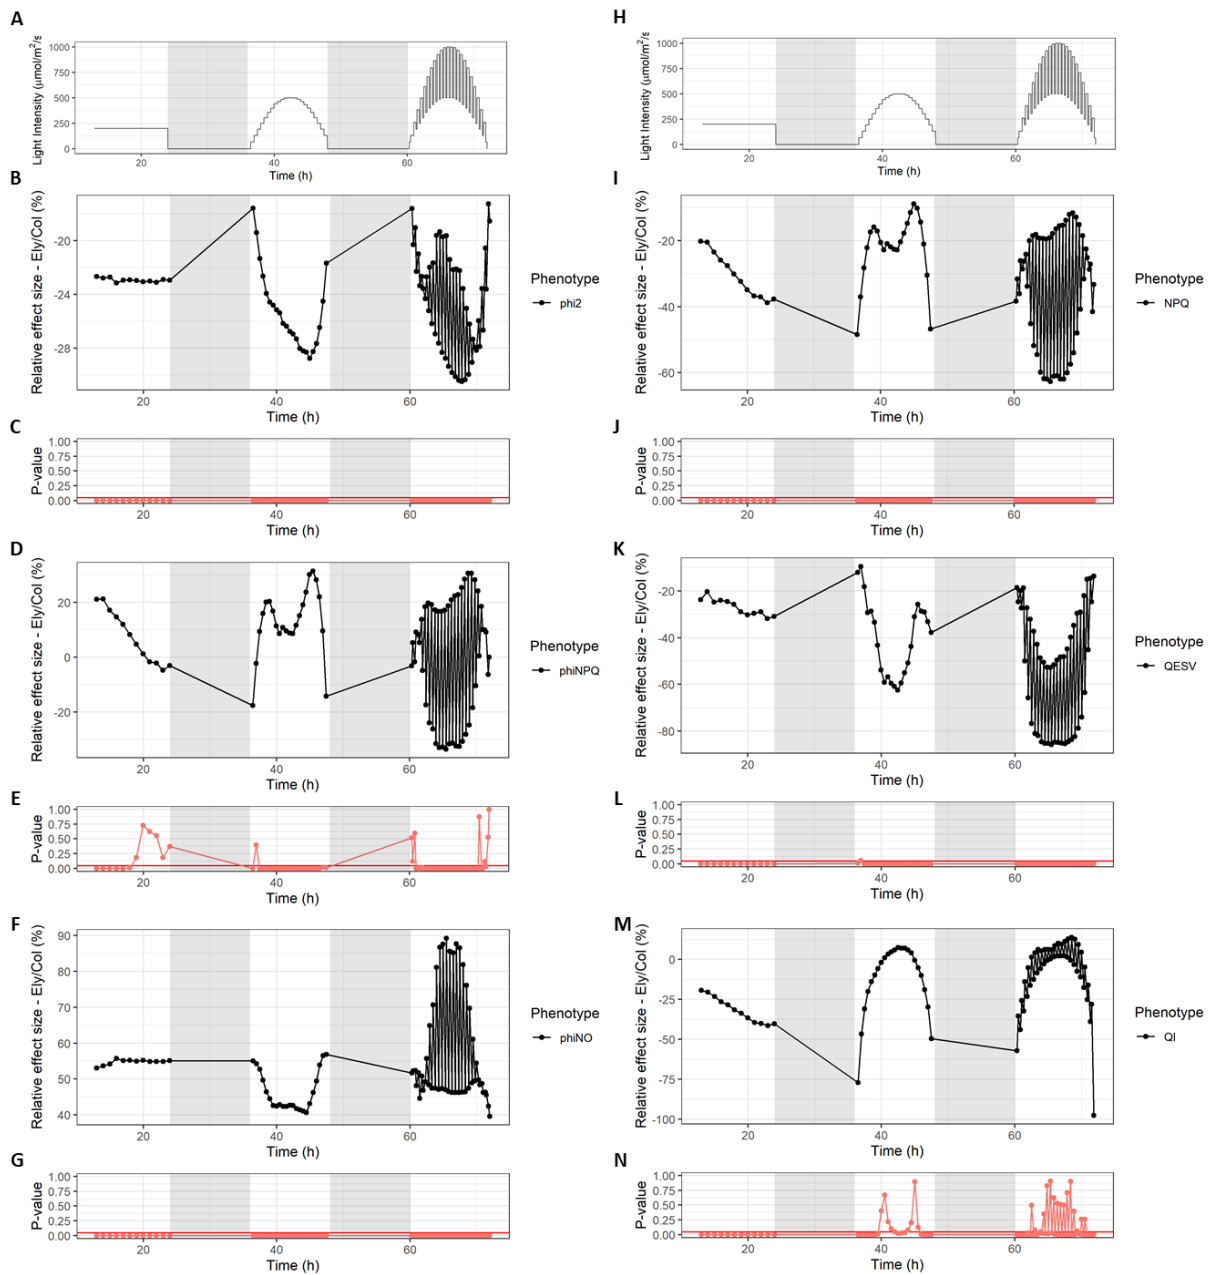

1099

1100 **Supplementary Figure 1. Effect size of *Ely* plasmotype possessing a Ser264Gly amino acid**  
 1101 **substitution for different photosynthetic parameters in dynamic light conditions.** Panel A and H  
 1102 show the dynamic light regime to which the plants are exposed. For  $\Phi_{PSII}$ ,  $\Phi_{NPQ}$ ,  $\Phi_{NO}$ ,  $NPQ$ ,  $q_E$  and  $q_I$  the  
 1103 differences between the *Col* and *Ely* plasmotype are given, averaged over all nucleotypes. Below each  
 1104 panel with a phenotype, the p-value is given representing a t-test ( $n=4$ ).

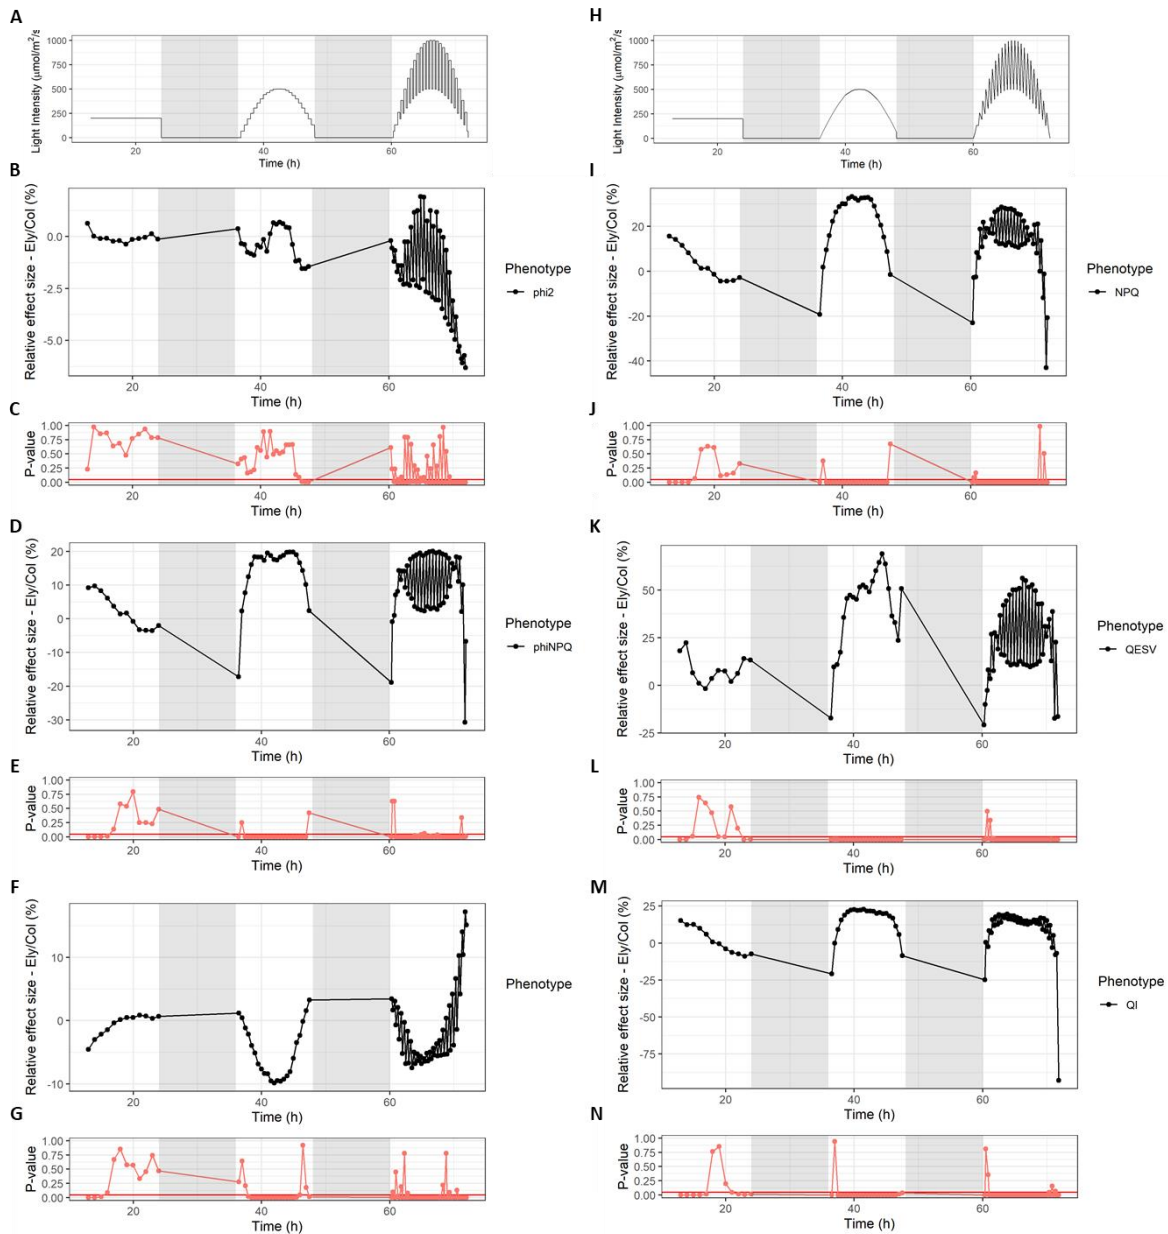

1105

1106 **Supplementary Figure 2. Effect size of Ely nucleotide for different photosynthetic parameters**  
 1107 **in dynamic light conditions.** Panel A and H show the dynamic light regime to which the plants are  
 1108 exposed. For  $\Phi_{PSII}$ ,  $\Phi_{NPQ}$ ,  $\Phi_{NO}$ , NPQ,  $q_E$  and  $q_I$  the differences between the Col and Ely nucleotide are given,  
 1109 averaged over all plasmotypes. Below each panel with a phenotype, the p-value is given representing a t-  
 1110 test ( $n=4$ ).

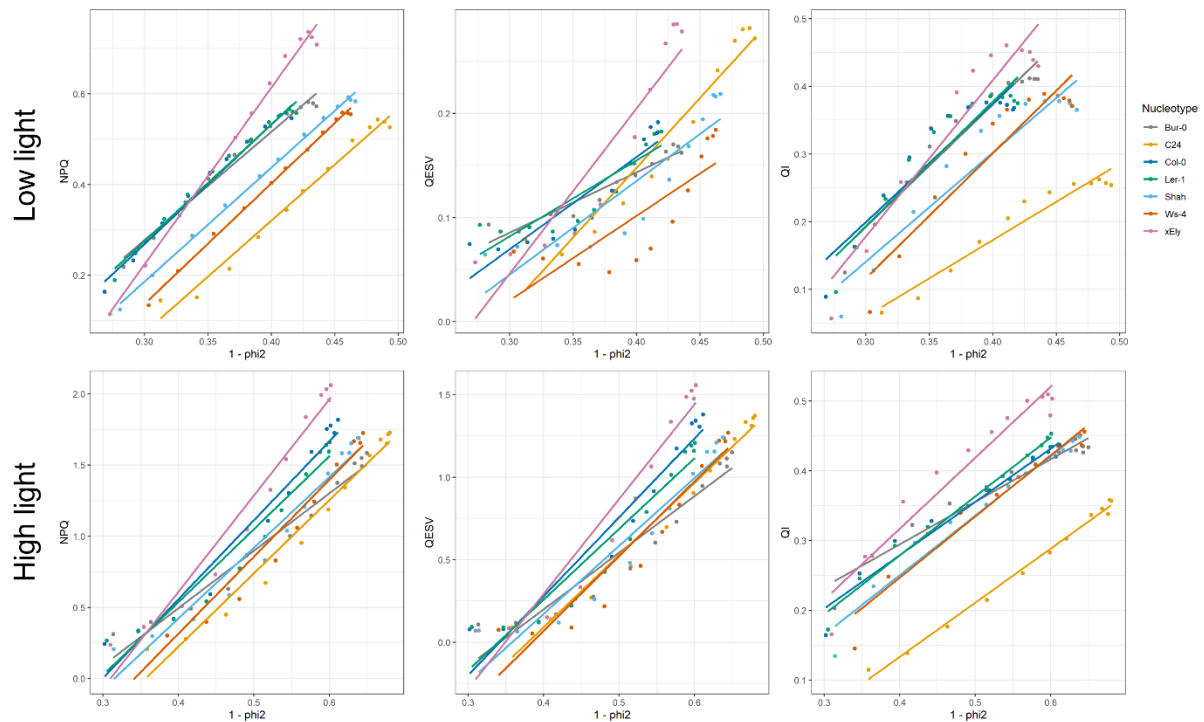

1111

1112 **Supplementary Figure 3. NPQ and components thereof,  $q_E$  and  $q_I$ , plotted against the**  
1113 **inefficiency of PSII.** The top panels visualize the response after high to low-light transitions and the  
1114 bottom panels visualize the response after low to high-light transitions. In all panels the averages of the  
1115 nucleotypes are given, averaged over the plasmotypes. The light intensities are taken from a fluctuating  
1116 light day, as shown in Figure 2A.



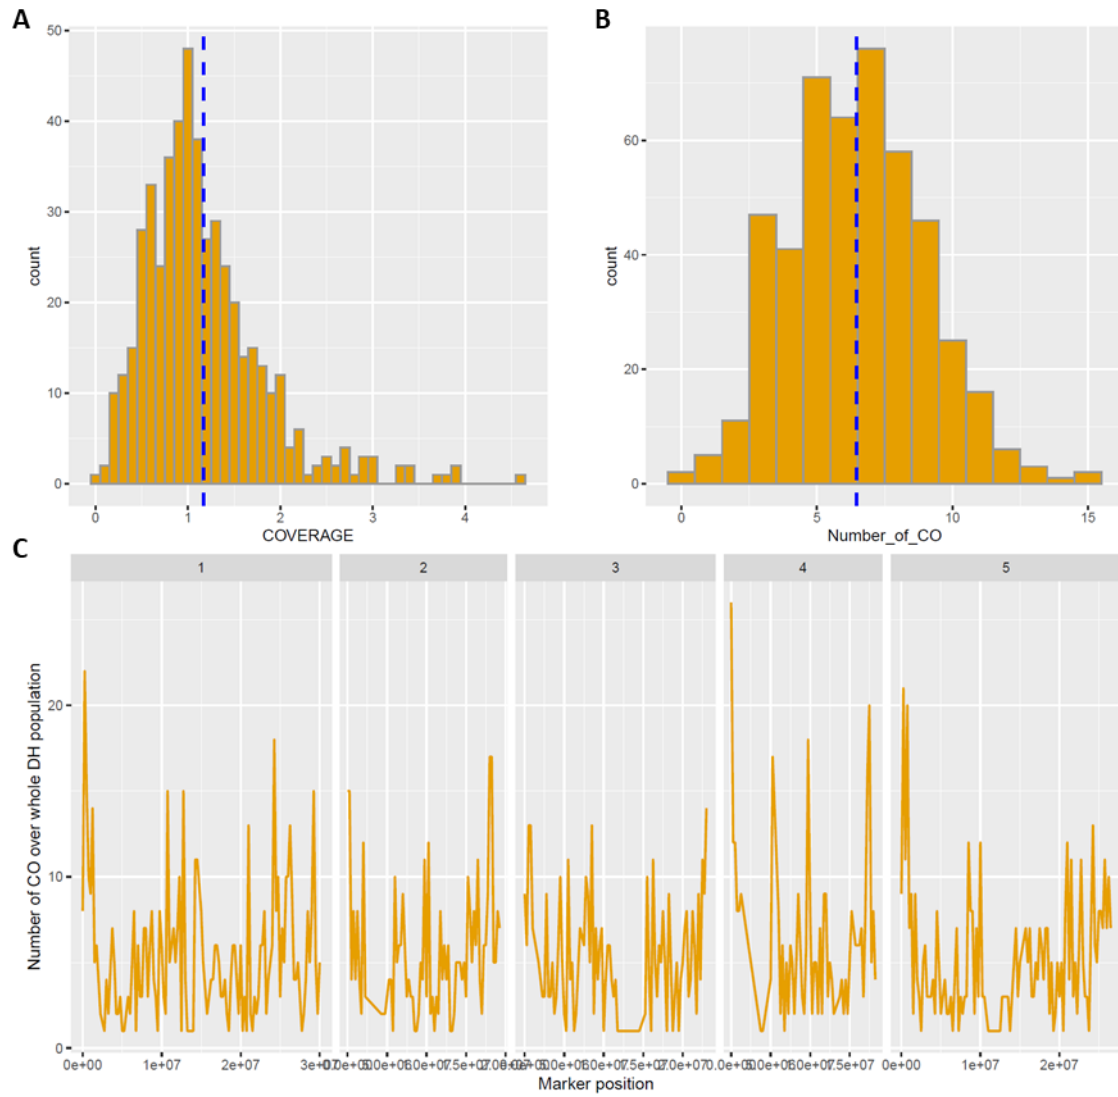

1117

1118 **Supplementary Figure 4. Properties of DH population.** A) Distribution of read coverage per DH  
1119 genotype. B) Distribution of cross overs per DH genotype. C) Average number of cross overs per 250Kbp  
1120 window.

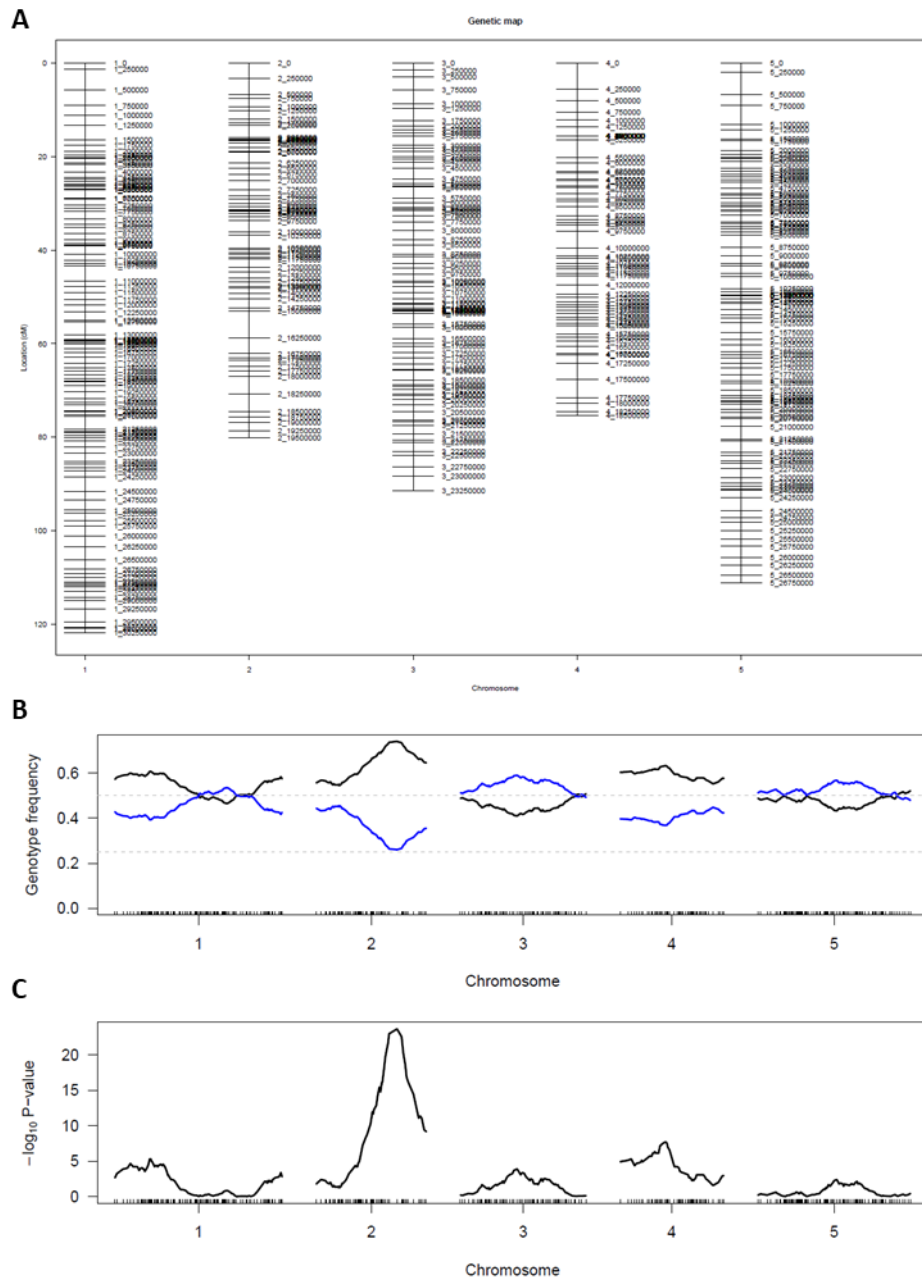

1121

1122 **Supplementary Figure 5. Genetic map and segregation distortion of Ely X Col DH population.** A)  
1123 genetic map based on markers representing 250kbp windows. B) Segregation distortion, with genotype  
1124 frequency of the Ely alleles in blue and Col alleles in black. C) Significance tests for segregation distortion,  
1125 with a sharp peak on chromosome 2, at physical mapping position 16.250Mbp.

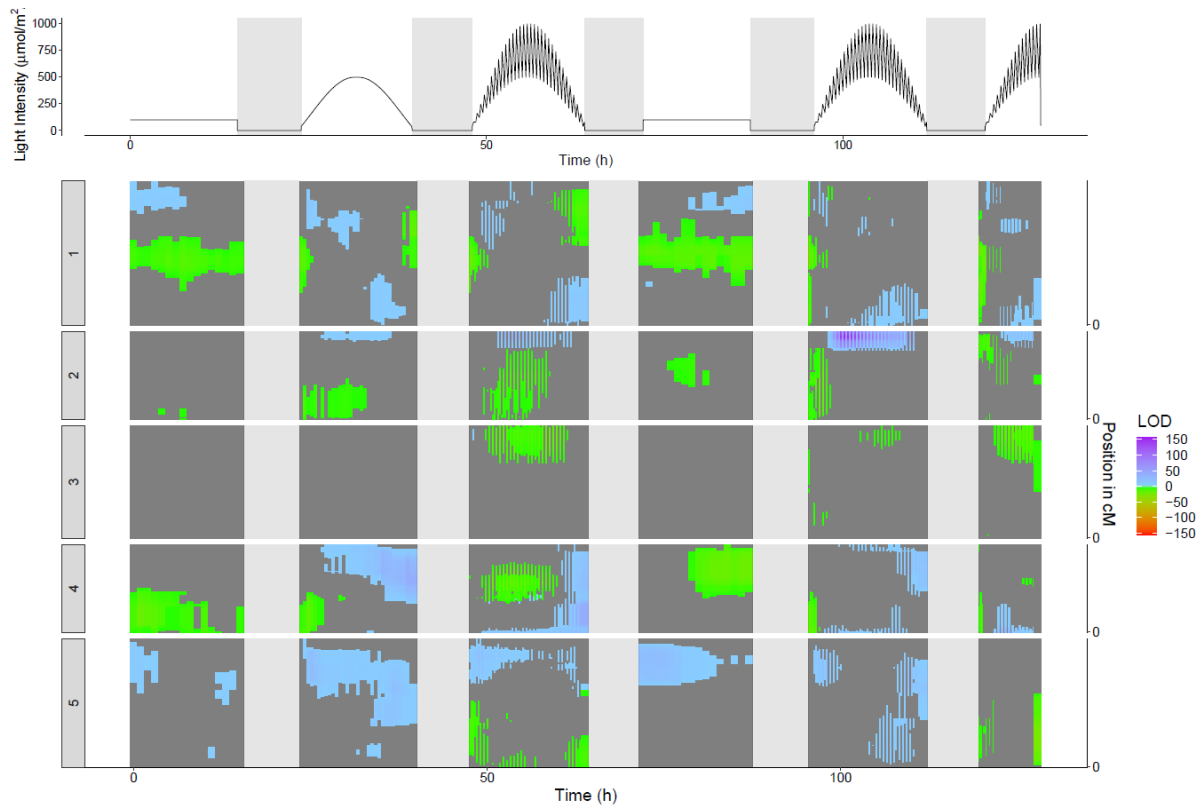

1126

1127 **Supplementary Figure 6. MQM plot for NPQ with DH genotypes having the Cvi plasmotype**  
1128 **removed.** This leaves 370 DH lines. In this plot the Col-0 phenotype is the control. When the Ely allele  
1129 has a trait-enhancing phenotype it is indicated with a positive LOD score (blue), and when the Ely allele  
1130 has a trait-reducing phenotype, it is indicated with a negative LOD score (green).

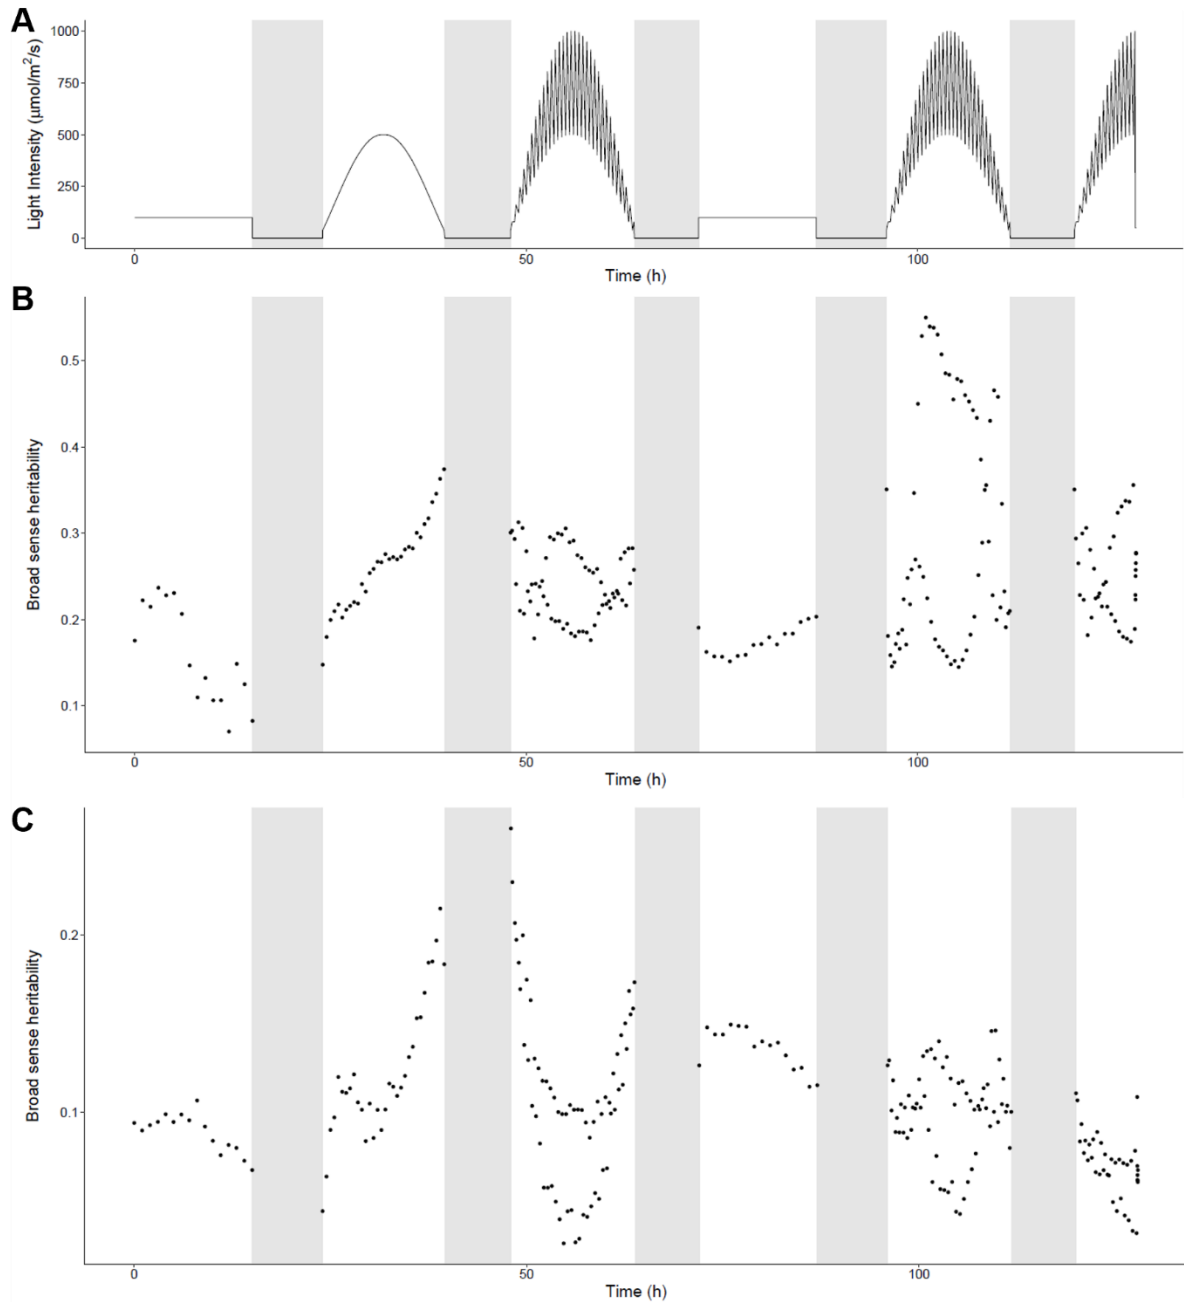

1131 **Supplementary Figure 7. Broad sense heritability ( $H^2$ ) as observed in the DH population in the**  
1132 **fluctuating light experiment.** A) Light conditions as plants were exposed during the experiment, and  
1133 matching the  $H^2$  in the panels below. B)  $H^2$  for the capacity of NPQ. C)  $H^2$  for the efficiency of PSII.

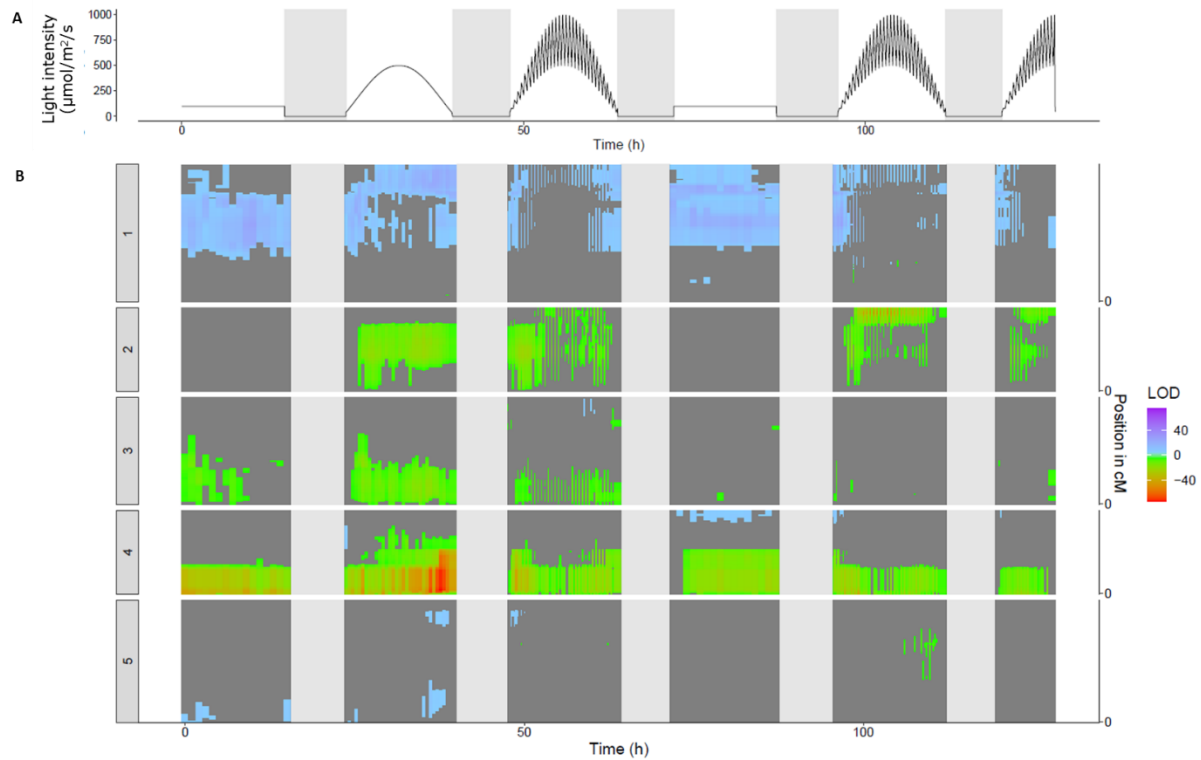

1134

1135 **Supplementary Figure 8. QTL map for  $\Phi_{\text{PSII}}$  in DEPI.** A) Represents the light intensities during the  
1136 experiment, where  $t = 0$  h is the moment when lights turned on, day 21 after sowing. In the first 21 days  
1137 plants were grown at a light intensity of  $200 \mu\text{mol m}^2 \text{s}^{-1}$ . B) Vertical representation of QTL mapping over  
1138 time, the times match the light intensities are shown in panel A. LOD scores are represented in positive  
1139 values if the effect size of the *Ely* allele of a given marker on that time point is higher as compared to *Col*  
1140 allele. Negative values are given when the *Ely* allele induces a lower effect as compared to *Col*. The dark  
1141 grey background indicates markers that do not pass a naive Bonferroni threshold (LOD threshold of 4.8).

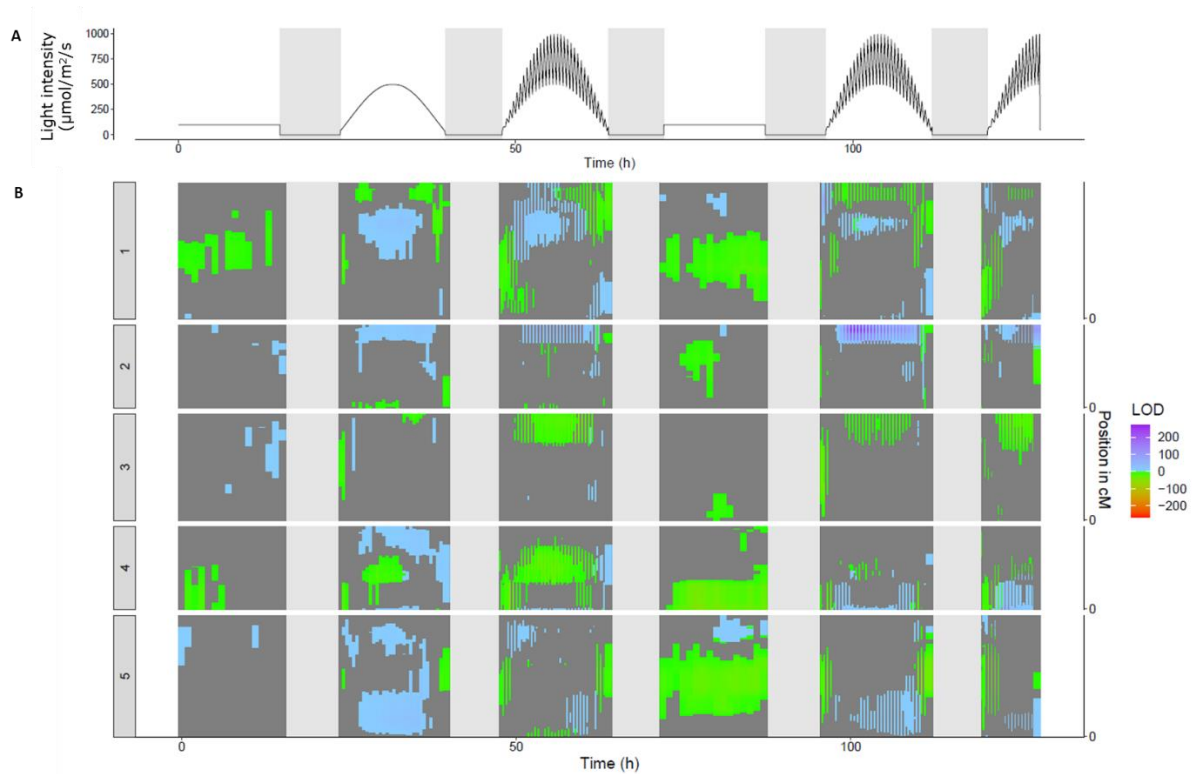

1142

1143 **Supplementary Figure 9. QTL map for  $q_E$  in DEPI.** A) Represents the light intensities during the  
1144 experiment, where  $t = 0$  h is the moment when lights turned on, day 21 after sowing. In the first 21 days  
1145 plants were grown at a light intensity of  $200 \mu\text{mol m}^2 \text{s}^{-1}$ . B) Vertical representation of QTL mapping over  
1146 time, the times match the light intensities are shown in panel A. LOD scores are represented in positive  
1147 values if the effect size of the Ely allele of a given marker on that time point is higher as compared to Col  
1148 allele. Negative values are given when the Ely allele induces a lower effect as compared to Col. The dark  
1149 grey background indicates markers that do not pass a naive Bonferroni threshold (LOD threshold of 4.8).

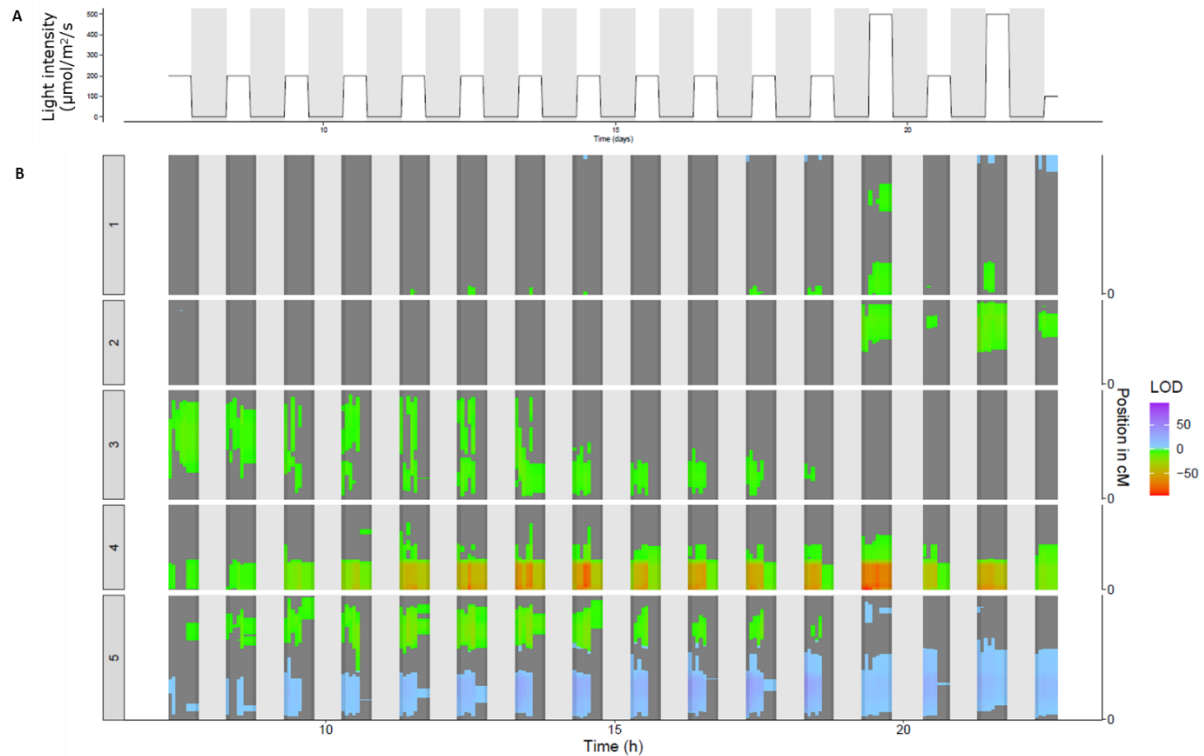

1150

1151 **Supplementary Figure 10. DH population in Phenovator system for  $\Phi_{PSII}$ .** A) Represents the light  
1152 intensities during the experiment, where the time is days after sowing. B) Vertical representation of QTL  
1153 mapping over time, the times match the light intensities are shown in panel A. LOD scores are represented  
1154 in positive values if the effect size of the *Ely* allele of a given marker on that time point is higher as  
1155 compared to *Col* allele. Negative values are given when the *Ely* allele induces a lower effect as compared  
1156 to *Col*. The dark grey background indicates markers that do not pass a naive Bonferroni threshold (LOD  
1157 threshold of 4.8).

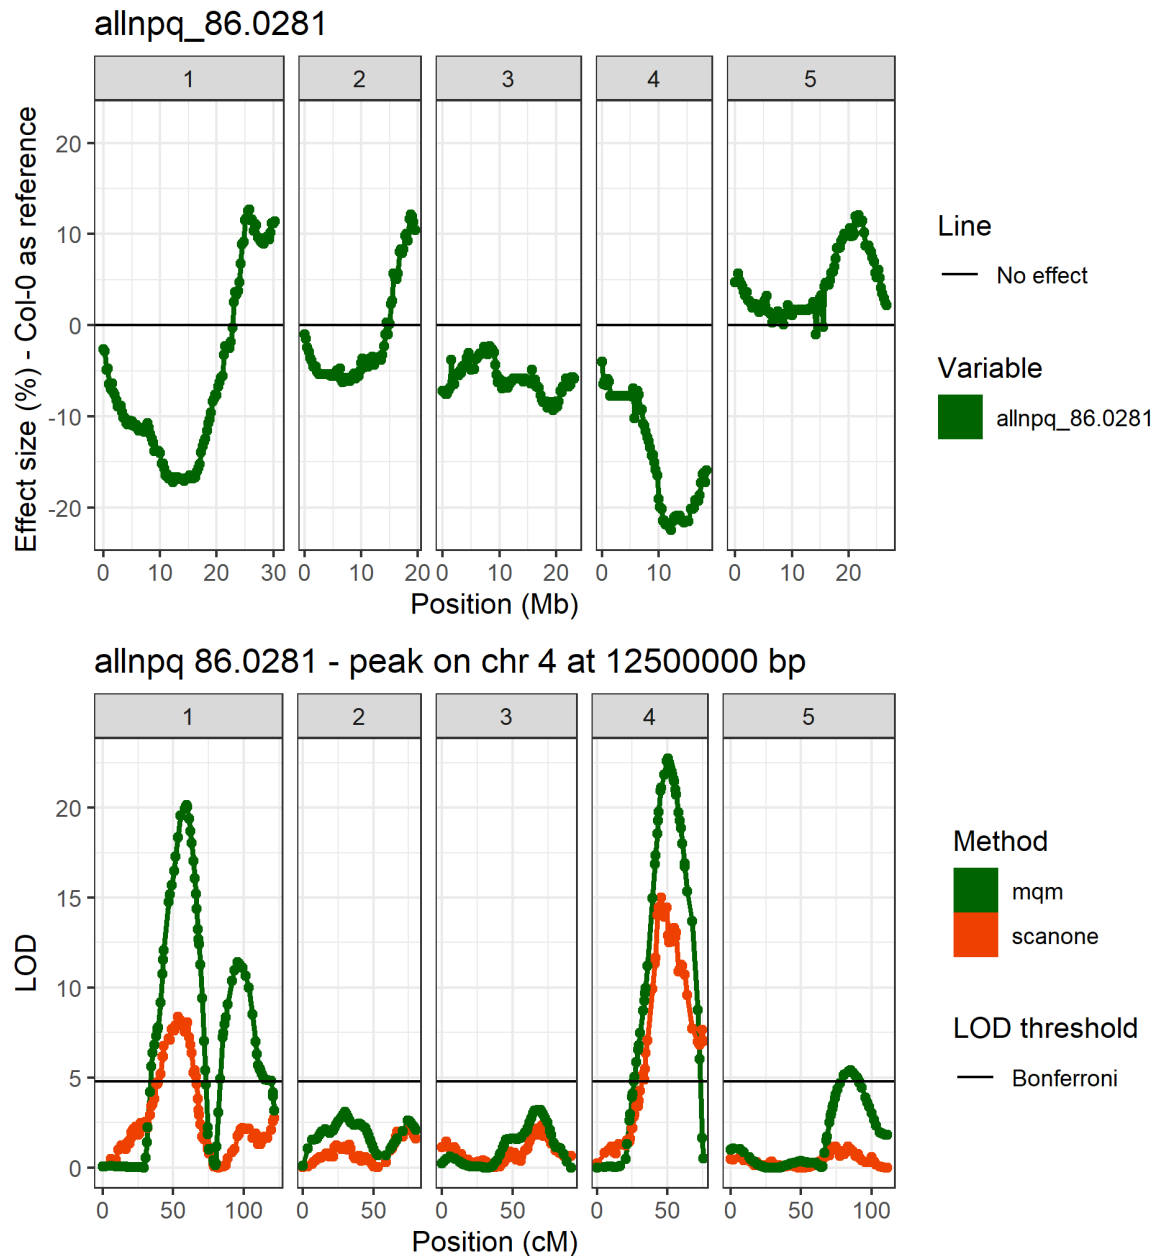

1158

1159 **Supplementary Figure 11. Example of a timepoint at which multiple QTLs are found for NPQ,**  
1160 **having opposing effect sizes.** A) Shows the effect size of a marker, when the Ely allele is compared to  
1161 the Col allele, a positive effect size means the Ely allele causes higher NPQ. B) Shows the QTL maps at the  
1162 same timepoint.



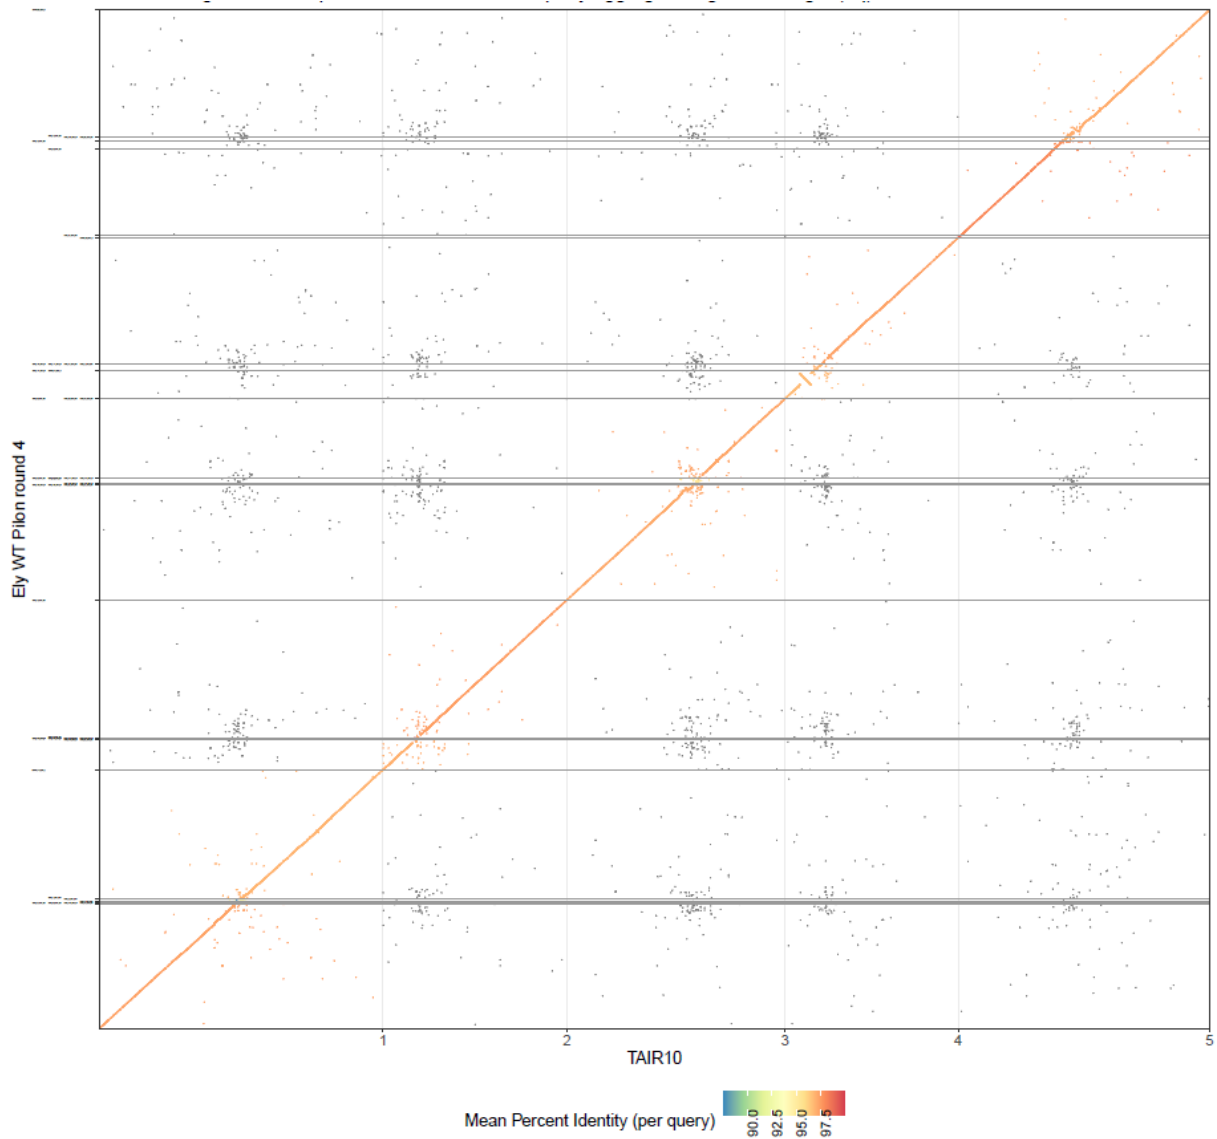

1163

1164 **Supplementary Figure 12. Dot plot of the de novo assembly of the Ely nuclear genome versus**  
1165 **the Col reference genome of TAIR10.1.**

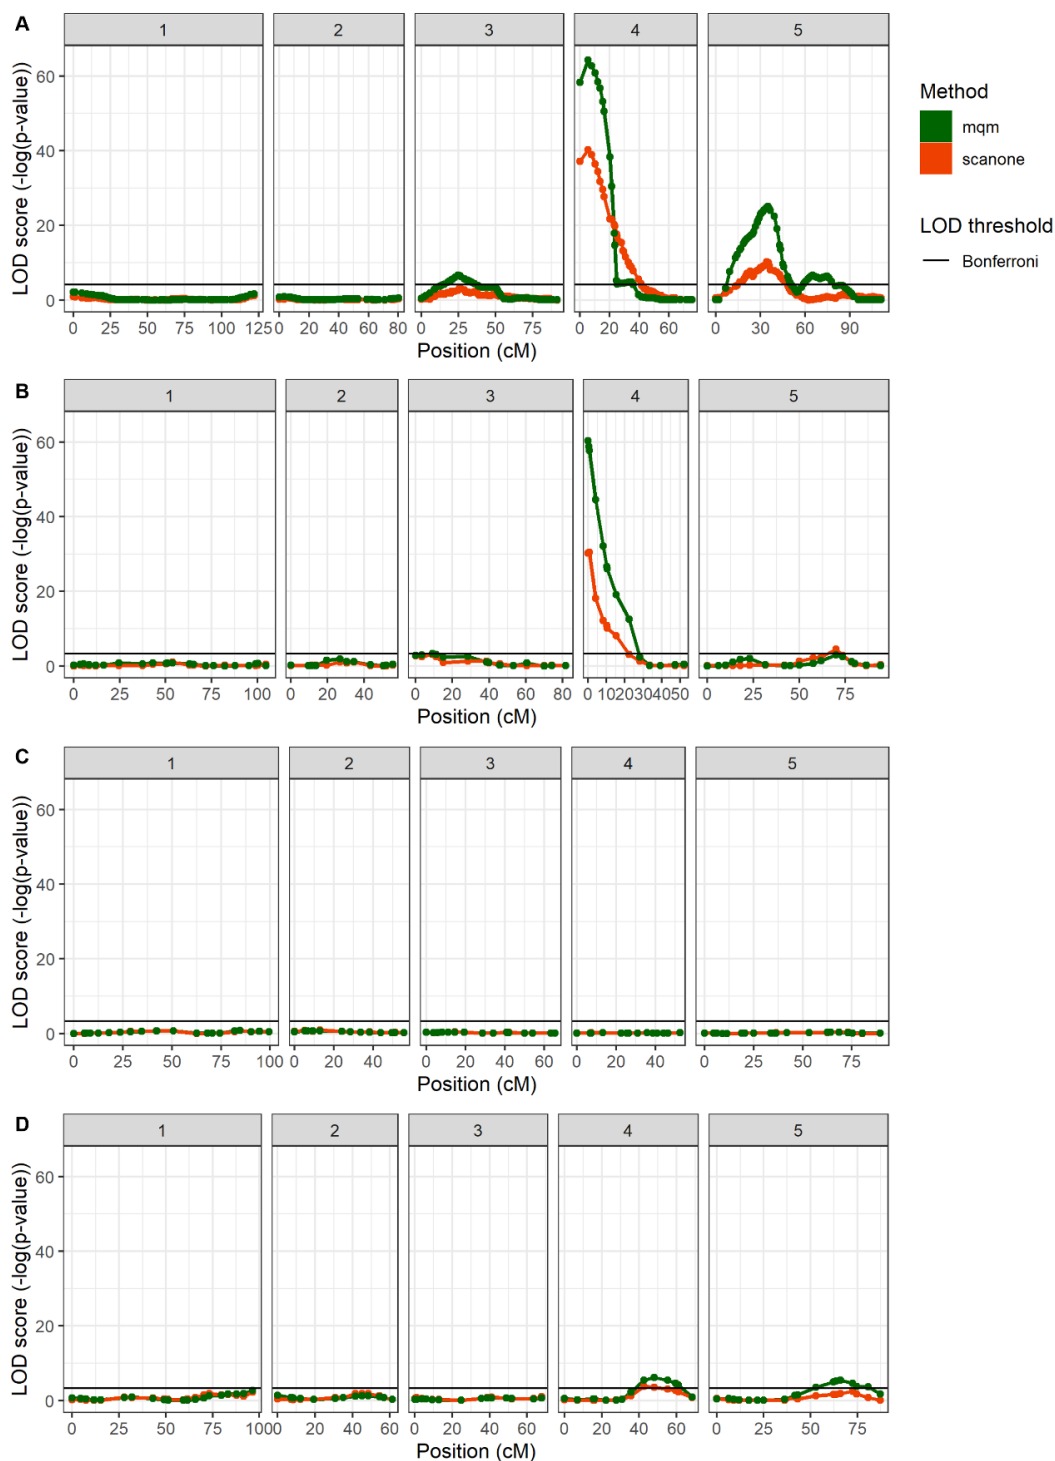

1166

1167 **Supplementary Figure 13. Comparison between the DH and RIL populations at 16.5 DAS for**  
 1168  **$\Phi_{PSII}$  for QTL-4<sup>0.25</sup>.** Note how the X-axis is on a cM scale representing the genetic map of every population  
 1169 independently. A) Ely x Col DH QTL map, showing the highest association at 250 Kbp (with a marker every  
 1170 250 Kbp). B) Can x Col RIL QTL map, showing the highest association at 651 Kbp (there are not markers  
 1171 to the left of this position). C) Bur x Col RIL QTL map, showing no significant association at this timepoint.  
 1172 D) Sha x Col RIL QTL map, showing no significant association at the beginning of chromosome 4.

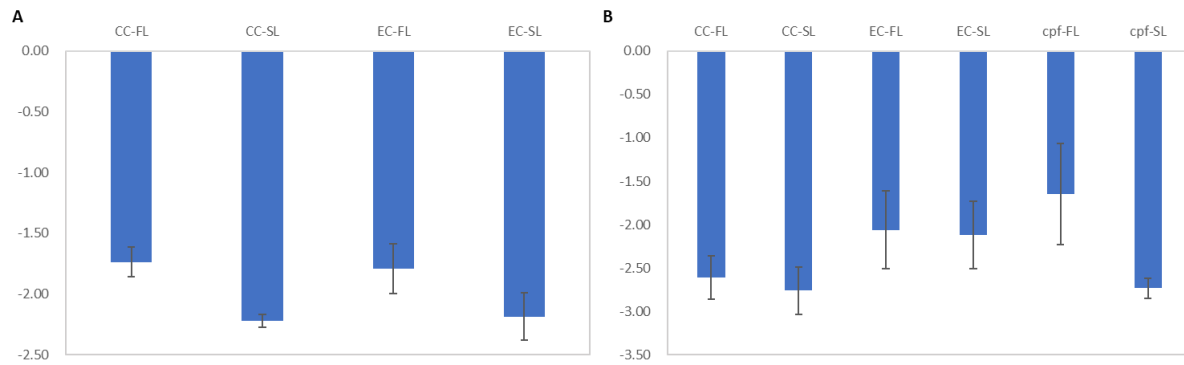

1173

1174 **Supplementary Figure 14. RT-qPCR results for genes in QTL-2<sup>18,500</sup>.** A) delta-Ct values for the primer  
1175 pair on PMM, with Col<sup>Col</sup> and Ely<sup>Col</sup> during stable light and fluctuating light (24 hours later). B) delta-Ct  
1176 values for the primer pair on cpFtsY, with Col<sup>Col</sup>, Ely<sup>Col</sup> and a cpftsY T-DNA line during stable light and  
1177 fluctuating light (24 hours later). For all samples the average of five reference genes was used to calculate  
1178 the delta-Ct values. These reference genes are PP2AA3, PPR, UBC9, UBQ7, SAND. All delta-Ct values are  
1179 calculated with n=6. Between genotypes no significant differences are observed ( $\alpha = 0.05$ ).

1180

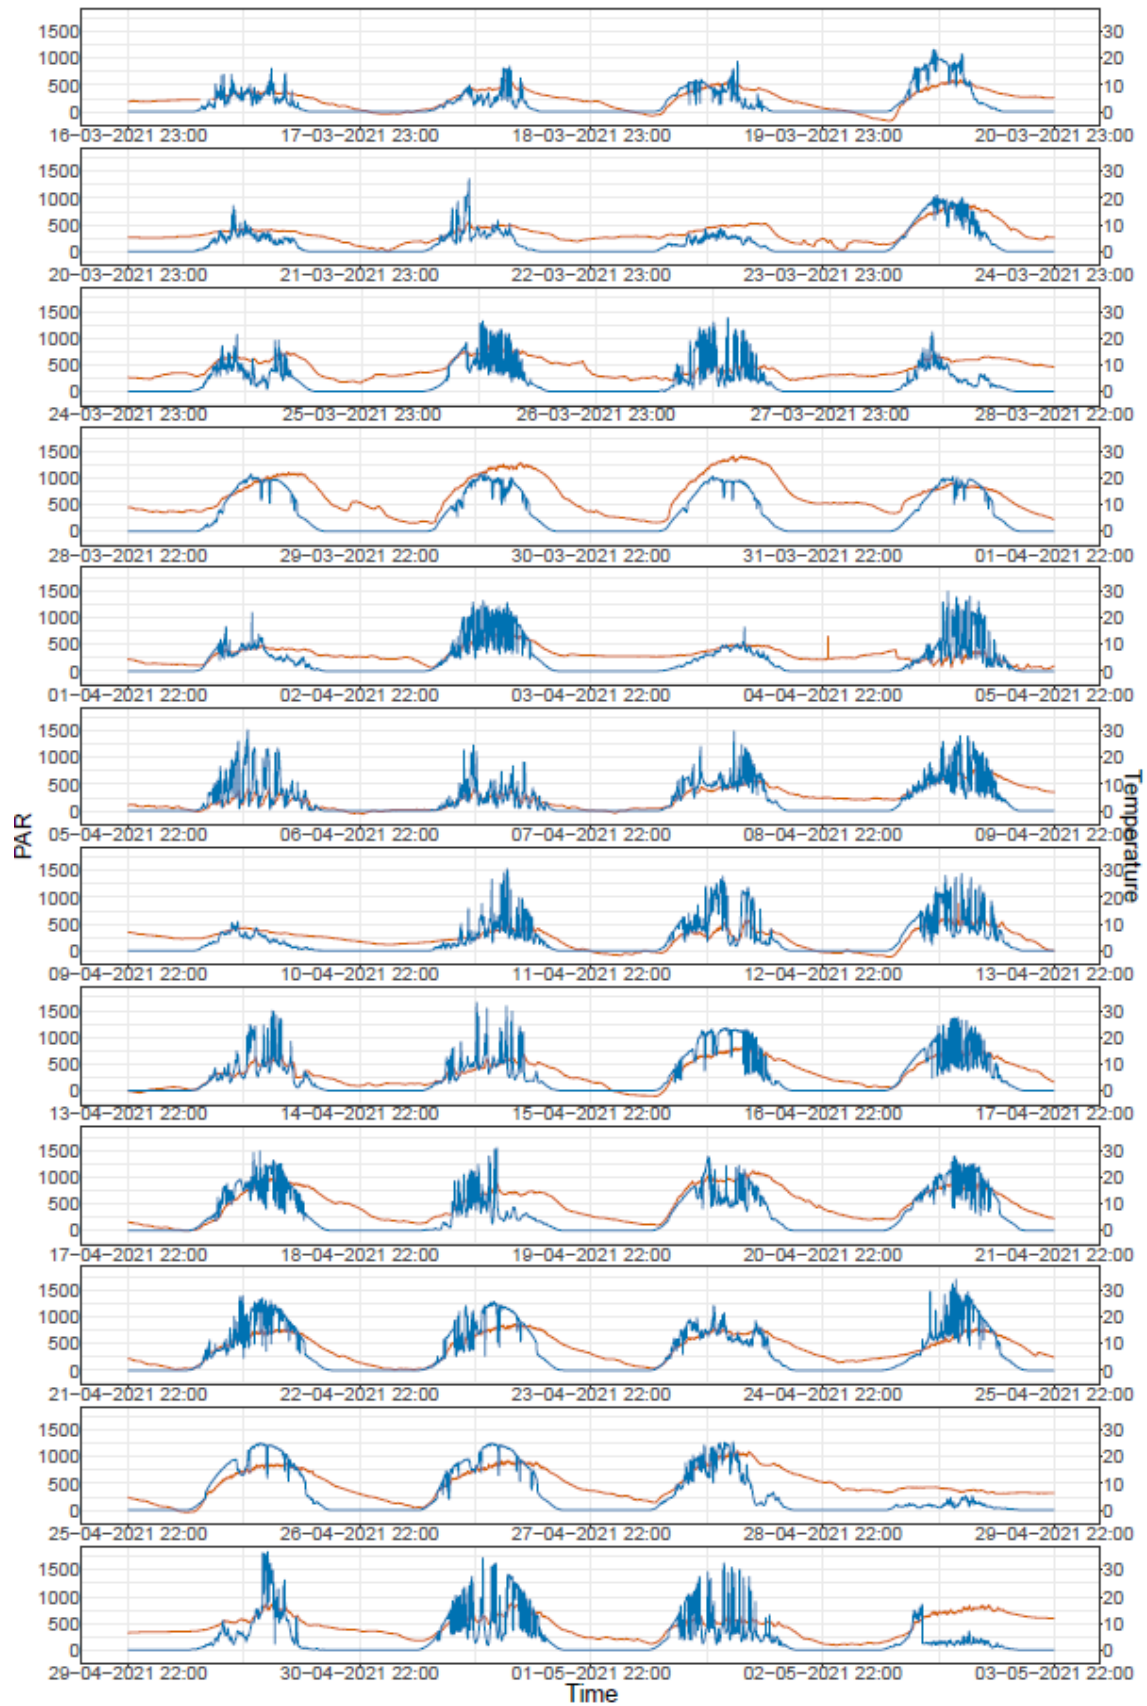

1181

1182 **Supplementary Figure 15.** Light intensity and temperature for the 2021 semi-protected tunnel  
1183 experiment.
